# Supplementary material for: A Pilot Application of an iTRAQ-Based Proteomics Screen Estimates the Effects of Cigarette Smokers’ Serum on RPE Cells With AMD High-Risk Alleles
Source: PubMed Central journal article supplement (PMC8842534; doi:10.1167/tvst.11.2.15), 2022-02-09
Supplement: tvst-11-2-15_s001.pdf [file tvst-11-2-15_s001.pdf]

## Biological Process

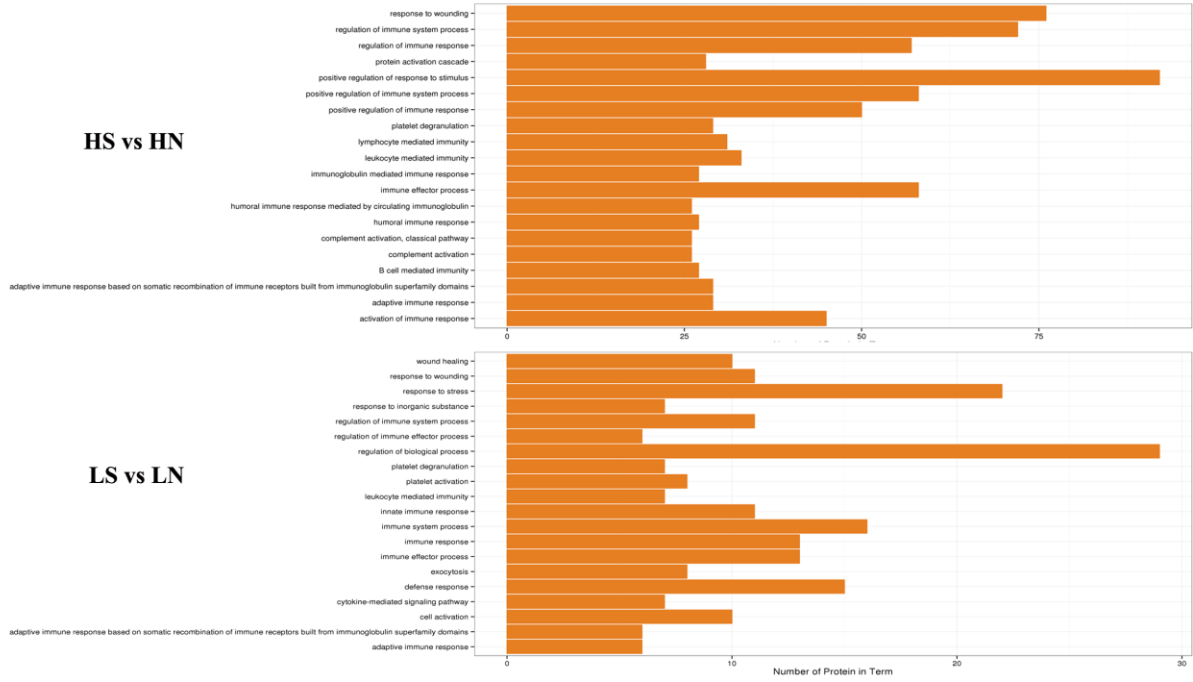

## S1a

## Molecular Function

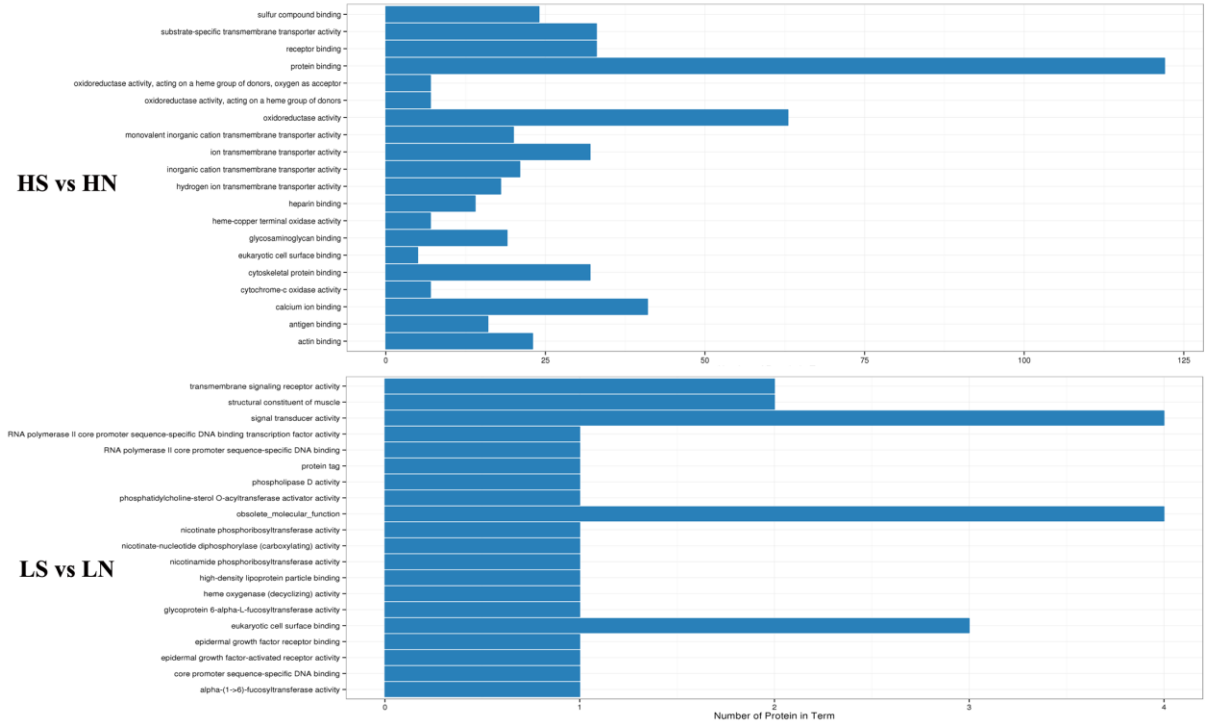

## S1b

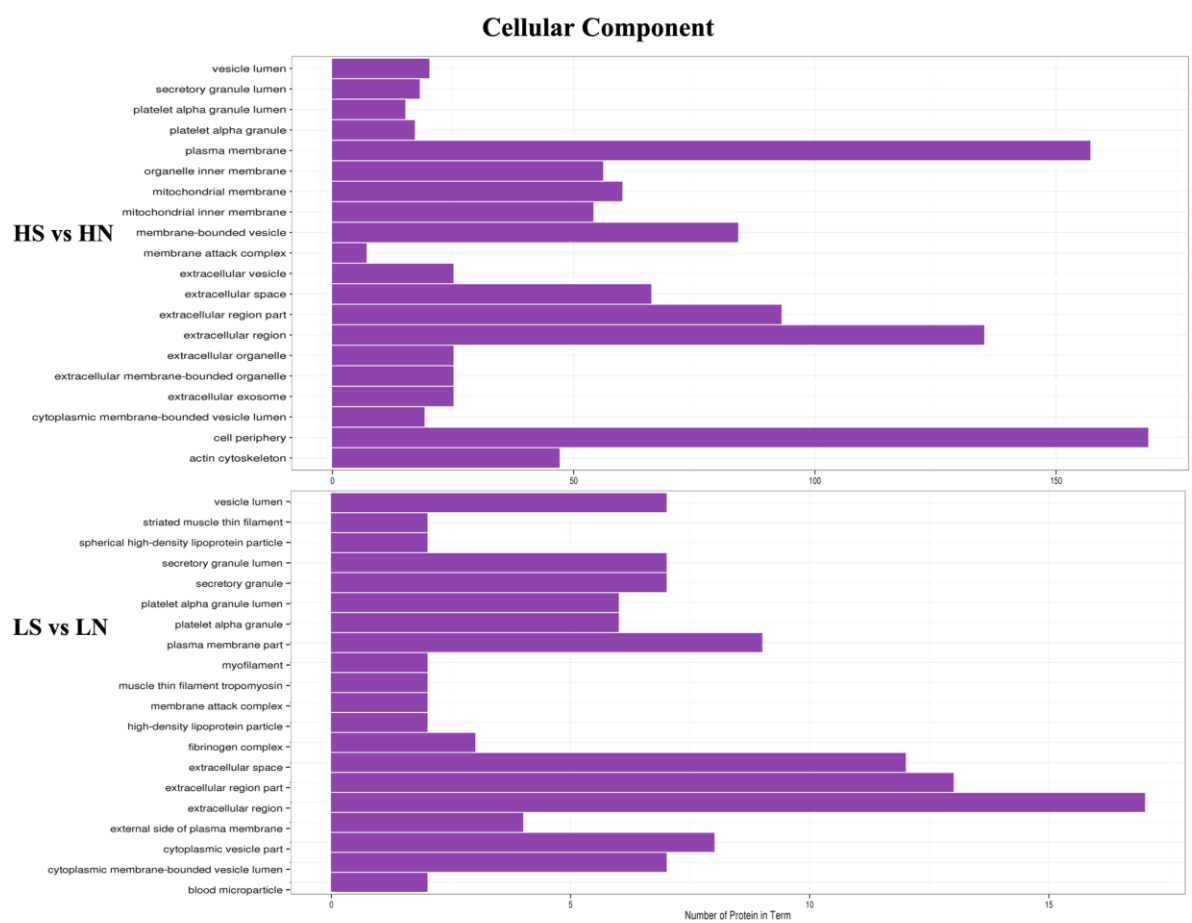

**S1c**

**Supplementary Figure S1.** GO annotation of the main altered proteins in the high-risk group and low-risk group: (A) Biological Process; (B) Molecular Function; and (C) Cellular Component.
