# Supplementary material for: A Pilot Application of an iTRAQ-Based Proteomics Screen Estimates the Effects of Cigarette Smokers’ Serum on RPE Cells With AMD High-Risk Alleles
Source: PubMed Central journal article supplement (PMC8842534; doi:10.1167/tvst.11.2.15), 2022-02-09
Supplement: tvst-11-2-15_s002.pdf [file tvst-11-2-15_s002.pdf]

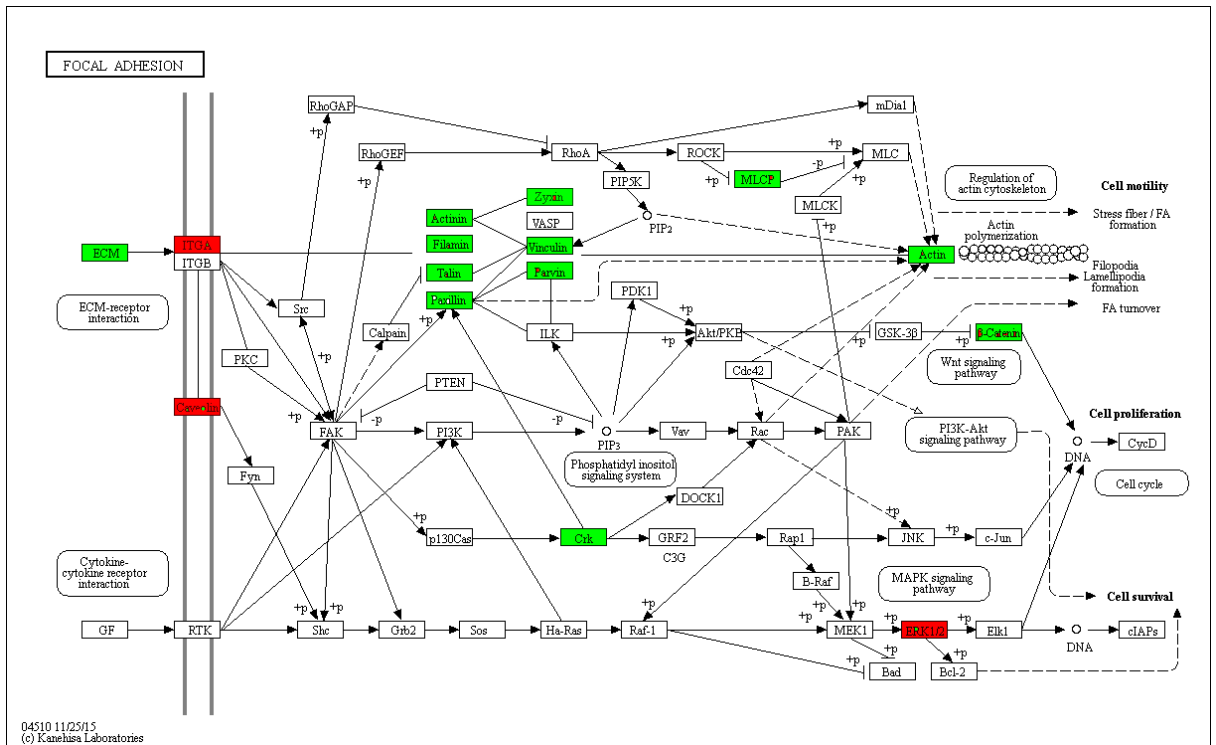

Supplementary Figure S2. Focal adhesion pathways.
