# Supplementary material for: A Pilot Application of an iTRAQ-Based Proteomics Screen Estimates the Effects of Cigarette Smokers’ Serum on RPE Cells With AMD High-Risk Alleles
Source: PubMed Central journal article supplement (PMC8842534; doi:10.1167/tvst.11.2.15), 2022-02-09
Supplement: tvst-11-2-15_s003.pdf [file tvst-11-2-15_s003.pdf]

Table S1 Differentially expressed proteins in high risk group after smoker serum stimulation (HS vs HN)(ratio<0.8 or ratio>1.2, P<0.05)

| Accession | Description                                                                                            | p_value        | ratio          |
|-----------|--------------------------------------------------------------------------------------------------------|----------------|----------------|
| Q92743    | <b>Serine protease HTRA1 OS=Homo sapiens GN=HTRA1 PE=1 SV=1 - [HTRA1_HUMAN]</b>                        | <b>8.92E-1</b> | <b>1.72579</b> |
| Q03135    | <b>Caveolin-1 OS=Homo sapiens GN=CAV1 PE=1 SV=4 - [CAV1_HUMAN]</b>                                     | <b>0.00001</b> | <b>1.46853</b> |
| Q15942    | Zyxin OS=Homo sapiens GN=ZYGX PE=1 SV=1 - [ZYGX_HUMAN]                                                 | 2.13E-0        | 0.73288        |
| Q7Z2W4    | Zinc finger CCCH-type antiviral protein 1 OS=Homo sapiens GN=ZC3HAV1 PE=1 SV=3 - [ZCCHV_HUMAN]         | 0.04902        | 1.22100        |
| Q93050    | V-type proton ATPase 116 kDa subunit a isoform 1 OS=Homo sapiens GN=ATP6V0A1 PE=1 SV=3 - [VPP1_HUMAN]  | 0.00002        | 1.22913        |
| Q9Y277    | Voltage-dependent anion-selective channel protein 3 OS=Homo sapiens GN=VDAC3 PE=1 SV=1 - [VDAC3_HUMAN] | 0.00003        | 1.21013        |
| P45880    | Voltage-dependent anion-selective channel protein 2 OS=Homo sapiens GN=VDAC2 PE=1 SV=2 - [VDAC2_HUMAN] | 1.42E-2        | 1.26348        |
| P21796    | Voltage-dependent anion-selective channel protein 1 OS=Homo sapiens GN=VDAC1 PE=1 SV=2 - [VDAC1_HUMAN] | 4.33E-4        | 1.30260        |
| P04004    | Vitronectin OS=Homo sapiens GN=VTN PE=1 SV=1 - [VTNC_HUMAN]                                            | 2.76E-4        | 2.35239        |
| P18206    | Vinculin OS=Homo sapiens GN=VCL PE=1 SV=4 - [VINC_HUMAN]                                               | 2.94E-7        | 0.65593        |
| P08670    | Vimentin OS=Homo sapiens GN=VIM PE=1 SV=4 - [VIME_HUMAN]                                               | 0              | 0.43188        |
| P13611    | Versican core protein OS=Homo sapiens GN=VCAN PE=1 SV=3 - [CSPG2_HUMAN]                                | 5.23E-1        | 0.72538        |
| Q9Y224    | UPF0568 protein C14orf166 OS=Homo sapiens GN=C14orf166 PE=1 SV=1 - [CN166_HUMAN]                       | 0.00343        | 0.64821        |
| Q14376    | UDP-glucose 4-epimerase OS=Homo sapiens GN=GALE PE=1 SV=2 - [GALE_HUMAN]                               | 0.00001        | 1.29449        |
| Q13404    | Ubiquitin-conjugating enzyme E2 variant 1 OS=Homo sapiens GN=UBE2V1 PE=1 SV=2 - [UB2V1_HUMAN]          | 4.91E-0        | 0.67550        |
| P61088    | Ubiquitin-conjugating enzyme E2 N OS=Homo sapiens GN=UBE2N PE=1 SV=1 - [UBE2N_HUMAN]                   | 0.00000        | 0.79221        |
| P68036    | Ubiquitin-conjugating enzyme E2 L3 OS=Homo sapiens GN=UBE2L3 PE=1 SV=1 - [UB2L3_HUMAN]                 | 1.91E-0        | 0.77789        |
| P62979    | Ubiquitin-40S ribosomal protein S27a OS=Homo sapiens GN=RPS27A PE=1 SV=2 - [RS27A_HUMAN]               | 1.23E-0        | 0.30024        |
| Q96FW1    | Ubiquitin thioesterase OTUB1 OS=Homo sapiens GN=OTUB1                                                  | 0.01364        | 0.72605        |

|        |                                                                                                              |         |         |
|--------|--------------------------------------------------------------------------------------------------------------|---------|---------|
|        | PE=1 SV=2 - [OTUB1_HUMAN]                                                                                    | 0037    | 823     |
| P09936 | Ubiquitin carboxyl-terminal hydrolase isozyme L1 OS=Homo sapiens GN=UCHL1 PE=1 SV=2 - [UCHL1_HUMAN]          | 7.76E-1 | 0.69901 |
|        |                                                                                                              | 3       | 7696    |
| O43290 | U4/U6.U5 tri-snRNP-associated protein 1 OS=Homo sapiens GN=SART1 PE=1 SV=1 - [SNUT1_HUMAN]                   | 0.00715 | 1.28907 |
|        |                                                                                                              | 0536    | 5089    |
| O43399 | Tumor protein D54 OS=Homo sapiens GN=TPD52L2 PE=1 SV=2 - [TPD54_HUMAN]                                       | 0.00263 | 0.76234 |
|        |                                                                                                              | 4539    | 0385    |
| P07951 | Tropomyosin beta chain OS=Homo sapiens GN=TPM2 PE=1 SV=1 - [TPM2_HUMAN]                                      | 3.29E-0 | 0.44355 |
|        |                                                                                                              | 9       | 4157    |
| P67936 | Tropomyosin alpha-4 chain OS=Homo sapiens GN=TPM4 PE=1 SV=3 - [TPM4_HUMAN]                                   | 7.48E-3 | 0.64234 |
|        |                                                                                                              | 2       | 3268    |
| P06753 | Tropomyosin alpha-3 chain OS=Homo sapiens GN=TPM3 PE=1 SV=2 - [TPM3_HUMAN]                                   | 4.84E-1 | 0.73505 |
|        |                                                                                                              | 0       | 6633    |
| P09493 | Tropomyosin alpha-1 chain OS=Homo sapiens GN=TPM1 PE=1 SV=2 - [TPM1_HUMAN]                                   | 4.86E-2 | 0.31650 |
|        |                                                                                                              | 7       | 1715    |
| P60174 | Triosephosphate isomerase OS=Homo sapiens GN=TPI1 PE=1 SV=3 - [TPIS_HUMAN]                                   | 2.96E-9 | 0.69131 |
|        |                                                                                                              | 7       | 1607    |
| P55084 | Trifunctional enzyme subunit beta, mitochondrial OS=Homo sapiens GN=HADHB PE=1 SV=3 - [ECHB_HUMAN]           | 1.63E-0 | 1.20510 |
|        |                                                                                                              | 8       | 6287    |
| P40939 | Trifunctional enzyme subunit alpha, mitochondrial OS=Homo sapiens GN=HADHA PE=1 SV=2 - [ECHA_HUMAN]          | 3.33E-2 | 1.21881 |
|        |                                                                                                              | 3       | 815     |
| P53007 | Tricarboxylate transport protein, mitochondrial OS=Homo sapiens GN=SLC25A1 PE=1 SV=2 - [TXTP_HUMAN]          | 0.00064 | 1.27492 |
|        |                                                                                                              | 3927    | 9423    |
| P02766 | Transthyretin OS=Homo sapiens GN=TTR PE=1 SV=1 - [TTHY_HUMAN]                                                | 0.00005 | 1.33626 |
|        |                                                                                                              | 56      | 7883    |
| Q6UW68 | Transmembrane protein 205 OS=Homo sapiens GN=TMEM205 PE=1 SV=1 - [TM205_HUMAN]                               | 3.18E-0 | 1.45436 |
|        |                                                                                                              | 8       | 9168    |
| Q9BVC6 | Transmembrane protein 109 OS=Homo sapiens GN=TMEM109 PE=1 SV=1 - [TM109_HUMAN]                               | 0.00206 | 1.42993 |
|        |                                                                                                              | 945     | 327     |
| Q9UM00 | Transmembrane and coiled-coil domain-containing protein 1 OS=Homo sapiens GN=TMCO1 PE=1 SV=1 - [TMCO1_HUMAN] | 0.00027 | 1.33511 |
|        |                                                                                                              | 9301    | 3485    |
| Q9HD45 | Transmembrane 9 superfamily member 3 OS=Homo sapiens GN=TM9SF3 PE=1 SV=2 - [TM9S3_HUMAN]                     | 0.00485 | 1.29505 |
|        |                                                                                                              | 8944    | 7198    |
| Q9UNL2 | Translocon-associated protein subunit gamma OS=Homo sapiens GN=SSR3 PE=1 SV=1 - [SSRG_HUMAN]                 | 0.01062 | 1.25805 |
|        |                                                                                                              | 4693    | 9443    |
| P51571 | Translocon-associated protein subunit delta OS=Homo sapiens GN=SSR4 PE=1 SV=1 - [SSRD_HUMAN]                 | 0.00107 | 1.33362 |
|        |                                                                                                              | 7725    | 9696    |
| P43307 | Translocon-associated protein subunit alpha OS=Homo sapiens GN=SSR1 PE=1 SV=3 - [SSRA_HUMAN]                 | 6.99E-1 | 1.32837 |
|        |                                                                                                              | 1       | 407     |
| P30536 | Translocator protein OS=Homo sapiens GN=TSPO PE=1 SV=3 - [TSPOA_HUMAN]                                       | 0.00015 | 1.25936 |
|        |                                                                                                              | 5767    | 6539    |

|        |                                                                                                                  |         |         |      |      |
|--------|------------------------------------------------------------------------------------------------------------------|---------|---------|------|------|
| Q9UGP8 | Translocation protein SEC63 homolog OS=Homo sapiens<br>GN=SEC63 PE=1 SV=2 - [SEC63_HUMAN]                        | 0.00951 | 1.22824 | 3993 | 9744 |
| P29401 | Transketolase OS=Homo sapiens GN=TKT PE=1 SV=3 -<br>[TKT_HUMAN]                                                  | 2.99E-6 | 0.71493 | 8    | 749  |
| P55072 | Transitional endoplasmic reticulum ATPase OS=Homo sapiens<br>GN=VCP PE=1 SV=4 - [TERA_HUMAN]                     | 4.32E-3 | 0.74680 | 5    | 5927 |
| Q9UI15 | Transgelin-3 OS=Homo sapiens GN=TAGLN3 PE=1 SV=2 -<br>[TAGL3_HUMAN]                                              | 0.00013 | 0.70915 | 3681 | 699  |
| P37802 | Transgelin-2 OS=Homo sapiens GN=TAGLN2 PE=1 SV=3 -<br>[TAGL2_HUMAN]                                              | 5.41E-3 | 0.57589 | 8    | 8844 |
| Q01995 | Transgelin OS=Homo sapiens GN=TAGLN PE=1 SV=4 -<br>[TAGL_HUMAN]                                                  | 1.65E-1 | 0.43693 | 19   | 7614 |
| P61812 | Transforming growth factor beta-2 OS=Homo sapiens<br>GN=TGFB2 PE=1 SV=1 - [TGFB2_HUMAN]                          | 2.08E-0 | 0.78102 | 8    | 5198 |
| P62995 | Transformer-2 protein homolog beta OS=Homo sapiens<br>GN=TRA2B PE=1 SV=1 - [TRA2B_HUMAN]                         | 0.00309 | 1.47956 | 9293 | 3529 |
| P02786 | Transferrin receptor protein 1 OS=Homo sapiens GN=TFRC PE=1<br>SV=2 - [TFR1_HUMAN]                               | 3.26E-0 | 1.22347 | 9    | 1836 |
| Q15370 | Transcription elongation factor B polypeptide 2 OS=Homo sapiens<br>GN=TCEB2 PE=1 SV=1 - [ELOB_HUMAN]             | 0.00712 | 0.74077 | 0873 | 9936 |
| P37837 | Transaldolase OS=Homo sapiens GN=TALDO1 PE=1 SV=2 -<br>[TALDO_HUMAN]                                             | 0.00000 | 0.76954 | 488  | 2325 |
| P04066 | Tissue alpha-L-fucosidase OS=Homo sapiens GN=FUCA1 PE=1<br>SV=4 - [FUCO_HUMAN]                                   | 0.00041 | 0.65238 | 7467 | 6648 |
| P62328 | Thymosin beta-4 OS=Homo sapiens GN=TMSB4X PE=1 SV=2 -<br>[TYB4_HUMAN]                                            | 0.00000 | 0.70272 | 0214 | 0112 |
| P19971 | Thymidine phosphorylase OS=Homo sapiens GN=TYMP PE=1<br>SV=2 - [TYPH_HUMAN]                                      | 0.01965 | 1.56006 | 7696 | 2402 |
| P07996 | Thrombospondin-1 OS=Homo sapiens GN=THBS1 PE=1 SV=2 -<br>[TSP1_HUMAN]                                            | 9.09E-1 | 0.48710 | 30   | 8107 |
| Q9H3N1 | Thioredoxin-related transmembrane protein 1 OS=Homo sapiens<br>GN=TMX1 PE=1 SV=1 - [TMX1_HUMAN]                  | 0.00001 | 1.31839 | 72   | 1562 |
| P30048 | Thioredoxin-dependent peroxide reductase, mitochondrial<br>OS=Homo sapiens GN=PRDX3 PE=1 SV=3 -<br>[PRDX3_HUMAN] | 7.62E-1 | 0.75488 | 0    | 4547 |
| P10599 | Thioredoxin OS=Homo sapiens GN=TXN PE=1 SV=3 -<br>[THIO_HUMAN]                                                   | 0.01724 | 0.79686 | 9815 | 5662 |
| Q8NBS9 | Thioredoxin domain-containing protein 5 OS=Homo sapiens<br>GN=TXNDC5 PE=1 SV=2 - [TXND5_HUMAN]                   | 1.78E-2 | 0.61982 | 0    | 5045 |
| O95881 | Thioredoxin domain-containing protein 12 OS=Homo sapiens<br>GN=TXNDC12 PE=1 SV=1 - [TXD12_HUMAN]                 | 0.00059 | 0.78346 | 3702 | 2906 |
| Q9Y490 | Talin-1 OS=Homo sapiens GN=TLN1 PE=1 SV=3 -                                                                      | 1.24E-2 | 0.52733 |      |      |

|        |                                                                                                                         |                 |                 |
|--------|-------------------------------------------------------------------------------------------------------------------------|-----------------|-----------------|
|        | [TLN1_HUMAN]                                                                                                            | 0               | 2461            |
| P04179 | Superoxide dismutase [Mn], mitochondrial OS=Homo sapiens<br>GN=SOD2 PE=1 SV=2 - [SODM_HUMAN]                            | 4.44E-2<br>3    | 1.52237<br>9869 |
| P00441 | Superoxide dismutase [Cu-Zn] OS=Homo sapiens GN=SOD1<br>PE=1 SV=2 - [SODC_HUMAN]                                        | 0.00002<br>03   | 0.79072<br>2193 |
| P50225 | Sulfotransferase 1A1 OS=Homo sapiens GN=SULT1A1 PE=1<br>SV=3 - [ST1A1_HUMAN]                                            | 0.00057<br>4122 | 1.38744<br>3635 |
| Q9Y6N5 | Sulfide:quinone oxidoreductase, mitochondrial OS=Homo sapiens<br>GN=SQRDL PE=1 SV=1 - [SQRD_HUMAN]                      | 1.98E-1<br>0    | 1.43054<br>6946 |
| P38646 | Stress-70 protein, mitochondrial OS=Homo sapiens GN=HSPA9<br>PE=1 SV=2 - [GRP75_HUMAN]                                  | 3.73E-1<br>8    | 1.21850<br>0905 |
| Q9UJZ1 | Stomatin-like protein 2, mitochondrial OS=Homo sapiens<br>GN=STOML2 PE=1 SV=1 - [STML2_HUMAN]                           | 1.88E-0<br>8    | 1.41207<br>3227 |
| Q15738 | Sterol-4-alpha-carboxylate 3-dehydrogenase, decarboxylating<br>OS=Homo sapiens GN=NSDHL PE=1 SV=2 -<br>[NSDHL_HUMAN]    | 0.00057<br>4028 | 1.29849<br>0505 |
| Q14247 | Src substrate cortactin OS=Homo sapiens GN=CTTN PE=1 SV=2<br>- [SRC8_HUMAN]                                             | 0.00000<br>15   | 0.78476<br>9656 |
| Q12874 | Splicing factor 3A subunit 3 OS=Homo sapiens GN=SF3A3 PE=1<br>SV=1 - [SF3A3_HUMAN]                                      | 0.01360<br>3896 | 0.69096<br>5624 |
| P09486 | SPARC OS=Homo sapiens GN=SPARC PE=1 SV=1 -<br>[SPRC_HUMAN]                                                              | 1.14E-0<br>8    | 0.40186<br>0038 |
| O94875 | Sorbin and SH3 domain-containing protein 2 OS=Homo sapiens<br>GN=SORBS2 PE=1 SV=3 - [SRBS2_HUMAN]                       | 0.00017<br>8404 | 0.77093<br>5723 |
| P11166 | Solute carrier family 2, facilitated glucose transporter member 1<br>OS=Homo sapiens GN=SLC2A1 PE=1 SV=2 - [GTR1_HUMAN] | 7.85E-1<br>7    | 1.30533<br>1859 |
| P54709 | Sodium/potassium-transporting ATPase subunit beta-3 OS=Homo<br>sapiens GN=ATP1B3 PE=1 SV=1 - [AT1B3_HUMAN]              | 0.00694<br>4261 | 1.23334<br>9778 |
| P61956 | Small ubiquitin-related modifier 2 OS=Homo sapiens<br>GN=SUMO2 PE=1 SV=3 - [SUMO2_HUMAN]                                | 0.00003<br>94   | 0.72758<br>1398 |
| P42226 | Signal transducer and activator of transcription 6 OS=Homo<br>sapiens GN=STAT6 PE=1 SV=1 - [STAT6_HUMAN]                | 0.01003<br>2111 | 1.20627<br>2618 |
| Q9H9B4 | Sideroflexin-1 OS=Homo sapiens GN=SFXN1 PE=1 SV=4 -<br>[SFXN1_HUMAN]                                                    | 0.00801<br>1694 | 1.34983<br>1272 |
| P50454 | Serpin H1 OS=Homo sapiens GN=SERPINH1 PE=1 SV=2 -<br>[SERPH_HUMAN]                                                      | 1.41E-1<br>07   | 0.68325<br>3128 |
| P02787 | Serotransferrin OS=Homo sapiens GN=TF PE=1 SV=3 -<br>[TRFE_HUMAN]                                                       | 0.04574<br>7523 | 1.29338<br>2194 |
| P34897 | Serine hydroxymethyltransferase, mitochondrial OS=Homo<br>sapiens GN=SHMT2 PE=1 SV=3 - [GLYM_HUMAN]                     | 1.01E-0<br>8    | 1.22146<br>7288 |
| P83111 | Serine beta-lactamase-like protein LACTB, mitochondrial<br>OS=Homo sapiens GN=LACTB PE=1 SV=2 -                         | 0.00846<br>748  | 1.37080<br>1919 |

|        |                                                                                                                  |         |         |
|--------|------------------------------------------------------------------------------------------------------------------|---------|---------|
|        | [LACTB_HUMAN]                                                                                                    |         |         |
| Q8N474 | Secreted frizzled-related protein 1 OS=Homo sapiens GN=SFRP1 PE=1 SV=1 - [SFRP1_HUMAN]                           | 0.00000 | 0.64112 |
|        |                                                                                                                  | 636     | 458     |
| O76054 | SEC14-like protein 2 OS=Homo sapiens GN=SEC14L2 PE=1 SV=1 - [S14L2_HUMAN]                                        | 0.00000 | 0.72744 |
|        |                                                                                                                  | 299     | 9078    |
| P35637 | RNA-binding protein FUS OS=Homo sapiens GN=FUS PE=1 SV=1 - [FUS_HUMAN]                                           | 0.03676 | 0.75414 |
|        |                                                                                                                  | 6045    | 7813    |
| Q01844 | RNA-binding protein EWS OS=Homo sapiens GN=EWSR1 PE=1 SV=1 - [EWS_HUMAN]                                         | 0.00455 | 0.77011 |
|        |                                                                                                                  | 472     | 9369    |
| P38159 | RNA-binding motif protein, X chromosome OS=Homo sapiens GN=RBMX PE=1 SV=3 - [RBMX_HUMAN]                         | 2.35E-0 | 0.79459 |
|        |                                                                                                                  | 9       | 6742    |
| Q9P2E9 | Ribosome-binding protein 1 OS=Homo sapiens GN=RRBP1 PE=1 SV=4 - [RRBP1_HUMAN]                                    | 3.06E-2 | 0.68127 |
|        |                                                                                                                  | 4       | 2054    |
| P60891 | Ribose-phosphate pyrophosphokinase 1 OS=Homo sapiens GN=PRPS1 PE=1 SV=2 - [PRPS1_HUMAN]                          | 0.01655 | 0.74367 |
|        |                                                                                                                  | 312     | 8731    |
| Q07960 | Rho GTPase-activating protein 1 OS=Homo sapiens GN=ARHGAP1 PE=1 SV=1 - [RHG01_HUMAN]                             | 1.14E-0 | 0.79169 |
|        |                                                                                                                  | 8       | 331     |
| P52565 | Rho GDP-dissociation inhibitor 1 OS=Homo sapiens GN=ARHGDI1 PE=1 SV=3 - [GDIR1_HUMAN]                            | 1.45E-0 | 0.73922 |
|        |                                                                                                                  | 8       | 8386    |
| P09455 | Retinol-binding protein 1 OS=Homo sapiens GN=RBP1 PE=1 SV=2 - [RET1_HUMAN]                                       | 1.11E-2 | 0.67110 |
|        |                                                                                                                  | 7       | 7159    |
| Q9NQC3 | Reticulon-4 OS=Homo sapiens GN=RTN4 PE=1 SV=2 - [RTN4_HUMAN]                                                     | 5.59E-1 | 0.52804 |
|        |                                                                                                                  | 0       | 1334    |
| Q96D15 | Reticulocalbin-3 OS=Homo sapiens GN=RCN3 PE=1 SV=1 - [RCN3_HUMAN]                                                | 0.04367 | 0.70113 |
|        |                                                                                                                  | 6488    | 9351    |
| Q00765 | Receptor expression-enhancing protein 5 OS=Homo sapiens GN=REEP5 PE=1 SV=3 - [REEP5_HUMAN]                       | 0.00040 | 0.77688 |
|        |                                                                                                                  | 1296    | 4692    |
| Q15404 | Ras suppressor protein 1 OS=Homo sapiens GN=RSU1 PE=1 SV=3 - [RSU1_HUMAN]                                        | 0.00000 | 0.71228 |
|        |                                                                                                                  | 0515    | 0555    |
| O43504 | Ragulator complex protein LAMTOR5 OS=Homo sapiens GN=LAMTOR5 PE=1 SV=1 - [LTOR5_HUMAN]                           | 0.00067 | 0.73846 |
|        |                                                                                                                  | 735     | 1538    |
| P35241 | Radixin OS=Homo sapiens GN=RDX PE=1 SV=1 - [RADI_HUMAN]                                                          | 0.01188 | 0.75891 |
|        |                                                                                                                  | 9521    | 7278    |
| P50395 | Rab GDP dissociation inhibitor beta OS=Homo sapiens GN=GDIB PE=1 SV=2 - [GDIB_HUMAN]                             | 0.00000 | 0.78623 |
|        |                                                                                                                  | 0554    | 9431    |
| P14618 | Pyruvate kinase PKM OS=Homo sapiens GN=PKM PE=1 SV=4 - [KPYM_HUMAN]                                              | 6.1E-15 | 0.61948 |
|        |                                                                                                                  | 2       | 1815    |
| A8MWD9 | Putative small nuclear ribonucleoprotein G-like protein 15 OS=Homo sapiens GN=SNRPGP15 PE=5 SV=2 - [RUXGL_HUMAN] | 0.01366 | 0.78385 |
|        |                                                                                                                  | 0598    | 2636    |
| P55786 | Puromycin-sensitive aminopeptidase OS=Homo sapiens GN=NPEPPS PE=1 SV=2 - [PSA_HUMAN]                             | 1.33E-0 | 0.79736 |
|        |                                                                                                                  | 9       | 6646    |

|        |                                                                                                              |         |         |      |      |
|--------|--------------------------------------------------------------------------------------------------------------|---------|---------|------|------|
| P00734 | Prothrombin OS=Homo sapiens GN=F2 PE=1 SV=2 -<br>[THRB_HUMAN]                                                | 2.86E-2 | 1.83644 | 7    | 8093 |
| P22061 | Protein-L-isoaspartate(D-aspartate) O-methyltransferase<br>OS=Homo sapiens GN=PCMT1 PE=1 SV=4 - [PIMT_HUMAN] | 0.00050 | 0.77947 | 0635 | 3855 |
| P21980 | Protein-glutamine gamma-glutamyltransferase 2 OS=Homo<br>sapiens GN=TGM2 PE=1 SV=2 - [TGM2_HUMAN]            | 2.09E-5 | 0.49935 | 3    | 6538 |
| O94855 | Protein transport protein Sec24D OS=Homo sapiens GN=SEC24D<br>PE=1 SV=2 - [SC24D_HUMAN]                      | 0.00004 | 0.79212 | 47   | 4024 |
| Q01105 | Protein SET OS=Homo sapiens GN=SET PE=1 SV=3 -<br>[SET_HUMAN]                                                | 1.72E-0 | 0.73486 | 8    | 1846 |
| P06703 | Protein S100-A6 OS=Homo sapiens GN=S100A6 PE=1 SV=1 -<br>[S10A6_HUMAN]                                       | 0.00004 | 0.76149 | 92   | 0345 |
| Q96FQ6 | Protein S100-A16 OS=Homo sapiens GN=S100A16 PE=1 SV=1 -<br>[S10AG_HUMAN]                                     | 0.00122 | 0.78385 | 9136 | 2636 |
| Q9Y570 | Protein phosphatase methylesterase 1 OS=Homo sapiens<br>GN=PPME1 PE=1 SV=3 - [PPME1_HUMAN]                   | 2.72E-0 | 0.66819 | 9    | 7954 |
| Q15435 | Protein phosphatase 1 regulatory subunit 7 OS=Homo sapiens<br>GN=PPP1R7 PE=1 SV=1 - [PP1R7_HUMAN]            | 0.00155 | 0.68137 | 5852 | 9415 |
| O60237 | Protein phosphatase 1 regulatory subunit 12B OS=Homo sapiens<br>GN=PPP1R12B PE=1 SV=2 - [MYPT2_HUMAN]        | 0.03556 | 0.74060 | 4577 | 3592 |
| Q86UE4 | Protein LYRIC OS=Homo sapiens GN=MTDH PE=1 SV=2 -<br>[LYRIC_HUMAN]                                           | 0.00150 | 1.23095 | 9874 | 8609 |
| P07237 | Protein disulfide-isomerase OS=Homo sapiens GN=P4HB PE=1<br>SV=3 - [PDIA1_HUMAN]                             | 3.29E-1 | 0.69800 | 77   | 6069 |
| Q15084 | Protein disulfide-isomerase A6 OS=Homo sapiens GN=PDIA6<br>PE=1 SV=1 - [PDIA6_HUMAN]                         | 8.76E-4 | 0.63887 | 3    | 5579 |
| P13667 | Protein disulfide-isomerase A4 OS=Homo sapiens GN=PDIA4<br>PE=1 SV=2 - [PDIA4_HUMAN]                         | 1.25E-3 | 0.75979 | 7    | 8092 |
| P30101 | Protein disulfide-isomerase A3 OS=Homo sapiens GN=PDIA3<br>PE=1 SV=4 - [PDIA3_HUMAN]                         | 1.75E-9 | 0.60208 | 9    | 7236 |
| Q99497 | Protein deglycase DJ-1 OS=Homo sapiens GN=PARK7 PE=1<br>SV=2 - [PARK7_HUMAN]                                 | 3.59E-2 | 0.71070 | 2    | 7154 |
| Q9BT09 | Protein canopy homolog 3 OS=Homo sapiens GN=CNPY3 PE=1<br>SV=1 - [CNPY3_HUMAN]                               | 0.01100 | 0.79586 | 543  | 152  |
| P41223 | Protein BUD31 homolog OS=Homo sapiens GN=BUD31 PE=1<br>SV=2 - [BUD31_HUMAN]                                  | 0.04981 | 0.69192 | 9407 | 1813 |
| Q96IU4 | Protein ABHD14B OS=Homo sapiens GN=ABHD14B PE=1<br>SV=1 - [ABHEB_HUMAN]                                      | 0.00025 | 0.77998 | 8206 | 0501 |
| P49720 | Proteasome subunit beta type-3 OS=Homo sapiens GN=PSMB3<br>PE=1 SV=2 - [PSB3_HUMAN]                          | 0.04943 | 0.79628 | 5648 | 4008 |
| P49721 | Proteasome subunit beta type-2 OS=Homo sapiens GN=PSMB2<br>PE=1 SV=1 - [PSB2_HUMAN]                          | 0.04940 | 0.76952 | 2029 | 6741 |

|         |                                                                                                                           |         |         |      |      |
|---------|---------------------------------------------------------------------------------------------------------------------------|---------|---------|------|------|
| P07602  | Prosaposin OS=Homo sapiens GN=PSAP PE=1 SV=2 -<br>[SAP_HUMAN]                                                             | 1.67E-6 | 0.55933 | 4    | 7526 |
| Q14005  | Pro-interleukin-16 OS=Homo sapiens GN=IL16 PE=1 SV=4 -<br>[IL16_HUMAN]                                                    | 0.00001 | 0.67578 | 1    | 9829 |
| Q99623  | Prohibitin-2 OS=Homo sapiens GN=PHB2 PE=1 SV=2 -<br>[PHB2_HUMAN]                                                          | 9.73E-1 | 1.26182 | 3    | 9653 |
| P35232  | Prohibitin OS=Homo sapiens GN=PHB PE=1 SV=1 -<br>[PHB_HUMAN]                                                              | 1.01E-3 | 1.37779 | 2    | 646  |
| P07737  | Profilin-1 OS=Homo sapiens GN=PFN1 PE=1 SV=2 -<br>[PROF1_HUMAN]                                                           | 2.91E-3 | 0.73360 | 2    | 2546 |
| Q96IZ0  | PRKC apoptosis WT1 regulator protein OS=Homo sapiens<br>GN=PAWR PE=1 SV=1 - [PAWR_HUMAN]                                  | 0.00000 | 0.59417 | 0361 | 7065 |
| P61758  | Prefoldin subunit 3 OS=Homo sapiens GN=VBP1 PE=1 SV=3 -<br>[PFD3_HUMAN]                                                   | 0.00097 | 0.67990 | 7494 | 8698 |
| P0CG39  | POTE ankyrin domain family member J OS=Homo sapiens<br>GN=POTEJ PE=3 SV=1 - [POTEJ_HUMAN]                                 | 3.15E-0 | 0.73621 | 8    | 0216 |
| P26599  | Polypyrimidine tract-binding protein 1 OS=Homo sapiens<br>GN=PTBP1 PE=1 SV=1 - [PTBP1_HUMAN]                              | 0.00986 | 0.79406 | 2934 | 0428 |
| Q9UHX1  | Poly(U)-binding-splicing factor PUF60 OS=Homo sapiens<br>GN=PUF60 PE=1 SV=1 - [PUF60_HUMAN]                               | 0.04506 | 0.79922 | 4546 | 3611 |
| Q9UUKK3 | Poly [ADP-ribose] polymerase 4 OS=Homo sapiens GN=PARP4<br>PE=1 SV=3 - [PARP4_HUMAN]                                      | 0.02810 | 0.65051 | 5222 | 2278 |
| P13797  | Plastin-3 OS=Homo sapiens GN=PLS3 PE=1 SV=4 -<br>[PLST_HUMAN]                                                             | 9.43E-1 | 0.79648 | 6    | 1629 |
| Q9HBL7  | Plasminogen receptor (KT) OS=Homo sapiens GN=PLGRKT<br>PE=1 SV=1 - [PLRKT_HUMAN]                                          | 0.02389 | 1.22137 | 158  | 4046 |
| P00747  | Plasminogen OS=Homo sapiens GN=PLG PE=1 SV=2 -<br>[PLMN_HUMAN]                                                            | 1.83E-1 | 2.08044 | 3    | 3827 |
| Q8NC51  | Plasminogen activator inhibitor 1 RNA-binding protein OS=Homo<br>sapiens GN=SERBP1 PE=1 SV=2 - [PAIRB_HUMAN]              | 0.00003 | 0.77000 | 6    | 8181 |
| P05155  | Plasma protease C1 inhibitor OS=Homo sapiens GN=SERPING1<br>PE=1 SV=2 - [IC1_HUMAN]                                       | 0.01956 | 1.74672 | 4904 | 4891 |
| P23634  | Plasma membrane calcium-transporting ATPase 4 OS=Homo<br>sapiens GN=ATP2B4 PE=1 SV=2 - [AT2B4_HUMAN]                      | 0.00024 | 1.35121 | 3347 | 0893 |
| Q9H008  | Phospholysine phosphohistidine inorganic pyrophosphate<br>phosphatase OS=Homo sapiens GN=LHPP PE=1 SV=2 -<br>[LHPP_HUMAN] | 0.00011 | 0.78150 | 4827 | 4396 |
| Q8IV08  | Phospholipase D3 OS=Homo sapiens GN=PLD3 PE=1 SV=1 -<br>[PLD3_HUMAN]                                                      | 0.00091 | 0.71686 | 9397 | 4231 |
| P18669  | Phosphoglycerate mutase 1 OS=Homo sapiens GN=PGAM1 PE=1<br>SV=2 - [PGAM1_HUMAN]                                           | 2.83E-4 | 0.70834 | 8    | 5416 |
| P07205  | Phosphoglycerate kinase 2 OS=Homo sapiens GN=PGK2 PE=1                                                                    | 0.02699 | 0.79428 |      |      |

|        |                                                                                                            |         |         |
|--------|------------------------------------------------------------------------------------------------------------|---------|---------|
|        | SV=3 - [PGK2_HUMAN]                                                                                        | 1311    | 1176    |
| P00558 | Phosphoglycerate kinase 1 OS=Homo sapiens GN=PGK1 PE=1 SV=3 - [PGK1_HUMAN]                                 | 1.21E-5 | 0.64668 |
|        |                                                                                                            | 8       | 1027    |
| Q15124 | Phosphoglucomutase-like protein 5 OS=Homo sapiens GN=PGM5 PE=1 SV=2 - [PGM5_HUMAN]                         | 1.17E-0 | 0.66804 |
|        |                                                                                                            | 8       | 9647    |
| Q13492 | Phosphatidylinositol-binding clathrin assembly protein OS=Homo sapiens GN=PICALM PE=1 SV=2 - [PICAL_HUMAN] | 0.00103 | 0.78057 |
|        |                                                                                                            | 1229    | 919     |
| P30086 | Phosphatidylethanolamine-binding protein 1 OS=Homo sapiens GN=PEBP1 PE=1 SV=3 - [PEBP1_HUMAN]              | 2.05E-1 | 0.76644 |
|        |                                                                                                            | 6       | 9747    |
| O95674 | Phosphatidate cytidyltransferase 2 OS=Homo sapiens GN=CDS2 PE=1 SV=1 - [CDS2_HUMAN]                        | 0.03353 | 1.43334 |
|        |                                                                                                            | 5997    | 9259    |
| O95571 | Persulfide dioxygenase ETHE1, mitochondrial OS=Homo sapiens GN=ETHE1 PE=1 SV=2 - [ETHE1_HUMAN]             | 0.01049 | 1.23851 |
|        |                                                                                                            | 6984    | 7906    |
| P51659 | Peroxisomal multifunctional enzyme type 2 OS=Homo sapiens GN=HSD17B4 PE=1 SV=3 - [DHB4_HUMAN]              | 0.00118 | 1.28302 |
|        |                                                                                                            | 144     | 7946    |
| Q15067 | Peroxisomal acyl-coenzyme A oxidase 1 OS=Homo sapiens GN=ACOX1 PE=1 SV=3 - [ACOX1_HUMAN]                   | 0.04103 | 1.49439 |
|        |                                                                                                            | 722     | 6014    |
| P30041 | Peroxiredoxin-6 OS=Homo sapiens GN=PRDX6 PE=1 SV=3 - [PRDX6_HUMAN]                                         |         | 0.51693 |
|        |                                                                                                            | 9.7E-15 | 2408    |
| P32119 | Peroxiredoxin-2 OS=Homo sapiens GN=PRDX2 PE=1 SV=5 - [PRDX2_HUMAN]                                         | 2.35E-2 | 0.76646 |
|        |                                                                                                            | 1       | 2027    |
| Q99541 | Perilipin-2 OS=Homo sapiens GN=PLIN2 PE=1 SV=2 - [PLIN2_HUMAN]                                             | 0.00021 | 2.44498 |
|        |                                                                                                            | 4342    | 7775    |
| Q13526 | Peptidyl-prolyl cis-trans isomerase NIMA-interacting 1 OS=Homo sapiens GN=PIN1 PE=1 SV=1 - [PIN1_HUMAN]    | 0.03247 | 0.79170 |
|        |                                                                                                            | 1858    | 2953    |
| P26885 | Peptidyl-prolyl cis-trans isomerase FKBP2 OS=Homo sapiens GN=FKBP2 PE=1 SV=2 - [FKBP2_HUMAN]               | 7.72E-1 | 0.71939 |
|        |                                                                                                            | 4       | 5707    |
| P45877 | Peptidyl-prolyl cis-trans isomerase C OS=Homo sapiens GN=PPIC PE=1 SV=1 - [PPIC_HUMAN]                     | 0.00000 | 0.58982 |
|        |                                                                                                            | 427     | 9652    |
| P23284 | Peptidyl-prolyl cis-trans isomerase B OS=Homo sapiens GN=PPIB PE=1 SV=2 - [PPIB_HUMAN]                     | 2.69E-8 | 0.45723 |
|        |                                                                                                            | 5       | 1239    |
| P62937 | Peptidyl-prolyl cis-trans isomerase A OS=Homo sapiens GN=PPIA PE=1 SV=2 - [PPIA_HUMAN]                     | 5.02E-4 | 0.70608 |
|        |                                                                                                            | 9       | 928     |
| P26022 | Pentraxin-related protein PTX3 OS=Homo sapiens GN=PTX3 PE=1 SV=3 - [PTX3_HUMAN]                            | 4.42E-0 | 2.32400 |
|        |                                                                                                            | 8       | 5034    |
| Q9NR12 | PDZ and LIM domain protein 7 OS=Homo sapiens GN=PDLIM7 PE=1 SV=1 - [PDLI7_HUMAN]                           | 5.59E-1 | 0.77792 |
|        |                                                                                                            | 4       | 6049    |
| Q96HC4 | PDZ and LIM domain protein 5 OS=Homo sapiens GN=PDLIM5 PE=1 SV=5 - [PDLI5_HUMAN]                           | 2.01E-1 | 0.76271 |
|        |                                                                                                            | 6       | 071     |
| P50479 | PDZ and LIM domain protein 4 OS=Homo sapiens GN=PDLIM4 PE=1 SV=2 - [PDLI4_HUMAN]                           | 6.22E-1 | 0.79842 |
|        |                                                                                                            | 0       | 0901    |
| Q8WX93 | Palladin OS=Homo sapiens GN=PALLD PE=1 SV=3 -                                                              | 8.5E-12 | 0.75884 |



|        |                                                                                                                      |         |         |
|--------|----------------------------------------------------------------------------------------------------------------------|---------|---------|
|        | [PALLD_HUMAN]                                                                                                        |         | 6064    |
|        | Oligoribonuclease, mitochondrial OS=Homo sapiens GN=REXO2                                                            | 0.01231 | 0.66146 |
| Q9Y3B8 | PE=1 SV=3 - [ORN_HUMAN]                                                                                              | 9487    | 3157    |
|        | Nucleosome assembly protein 1-like 1 OS=Homo sapiens                                                                 | 0.00015 | 0.79010 |
| P55209 | GN=NAP1L1 PE=1 SV=1 - [NP1L1_HUMAN]                                                                                  | 4578    | 5449    |
|        | Nucleoside diphosphate kinase B OS=Homo sapiens GN=NME2                                                              | 1.09E-1 | 0.64548 |
| P22392 | PE=1 SV=1 - [NDKB_HUMAN]                                                                                             | 8       | 2062    |
|        | Nucleolin OS=Homo sapiens GN=NCL PE=1 SV=3 -                                                                         |         | 0.78496 |
| P19338 | [NUCL_HUMAN]                                                                                                         | 4.5E-16 | 3587    |
|        | Nucleobindin-2 OS=Homo sapiens GN=NUCB2 PE=1 SV=2 -                                                                  | 0.00003 | 0.73893 |
| P80303 | [NUCB2_HUMAN]                                                                                                        | 57      | 7668    |
|        | Nicotinamide phosphoribosyltransferase OS=Homo sapiens                                                               | 1.07E-0 | 1.39778 |
| P43490 | GN=NAMPT PE=1 SV=1 - [NAMPT_HUMAN]                                                                                   | 8       | 6837    |
|        | Nexilin OS=Homo sapiens GN=NEXN PE=1 SV=1 -                                                                          | 0.00013 | 0.70571 |
| Q0ZGT2 | [NEXN_HUMAN]                                                                                                         | 9489    | 6302    |
|        | Neuroblast differentiation-associated protein AHNAK OS=Homo                                                          | 3.45E-1 | 0.74205 |
| Q09666 | sapiens GN=AHNAK PE=1 SV=2 - [AHNK_HUMAN]                                                                            | 36      | 1881    |
|        | NEDD8-activating enzyme E1 catalytic subunit OS=Homo sapiens                                                         | 0.00019 | 1.30633 |
| Q8TBC4 | GN=UBA3 PE=1 SV=2 - [UBA3_HUMAN]                                                                                     | 8503    | 5728    |
|        | NEDD8 OS=Homo sapiens GN=NEDD8 PE=1 SV=1 -                                                                           | 0.00000 | 0.72194 |
| Q15843 | [NEDD8_HUMAN]                                                                                                        | 0267    | 3472    |
|        | Nascent polypeptide-associated complex subunit alpha OS=Homo                                                         | 3.08E-0 | 0.76120 |
| Q13765 | sapiens GN=NACA PE=1 SV=1 - [NACA_HUMAN]                                                                             | 8       | 27      |
|        | NADH dehydrogenase [ubiquinone] iron-sulfur protein 3,<br>mitochondrial OS=Homo sapiens GN=NDUFS3 PE=1 SV=1 -        | 0.00643 | 1.26490 |
| O75489 | [NDUS3_HUMAN]                                                                                                        | 5198    | 7842    |
|        | NADH dehydrogenase [ubiquinone] flavoprotein 1, mitochondrial<br>OS=Homo sapiens GN=NDUFV1 PE=1 SV=4 -               | 0.00003 | 1.35104 |
| P49821 | [NDUV1_HUMAN]                                                                                                        | 75      | 7061    |
|        | NADH dehydrogenase [ubiquinone] 1 beta subcomplex subunit 10<br>OS=Homo sapiens GN=NDUFB10 PE=1 SV=3 -               | 0.00915 | 1.32625 |
| O96000 | [NDUBA_HUMAN]                                                                                                        | 4978    | 9947    |
|        | NADH dehydrogenase [ubiquinone] 1 beta subcomplex subunit 1<br>OS=Homo sapiens GN=NDUFB1 PE=1 SV=1 -                 | 0.00000 | 1.34907 |
| O75438 | [NDUB1_HUMAN]                                                                                                        | 445     | 2513    |
|        | NADH dehydrogenase [ubiquinone] 1 alpha subcomplex subunit<br>9, mitochondrial OS=Homo sapiens GN=NDUFA9 PE=1 SV=2 - | 0.00000 | 1.31771 |
| Q16795 | [NDUA9_HUMAN]                                                                                                        | 142     | 5959    |
|        | NADH dehydrogenase [ubiquinone] 1 alpha subcomplex subunit<br>13 OS=Homo sapiens GN=NDUFA13 PE=1 SV=3 -              | 0.00007 | 1.29198 |
| Q9P0J0 | [NDUAD_HUMAN]                                                                                                        | 17      | 9664    |
| O95299 | NADH dehydrogenase [ubiquinone] 1 alpha subcomplex subunit                                                           | 0.00161 | 1.22100 |

|        |                                                                                                                |                 |                         |
|--------|----------------------------------------------------------------------------------------------------------------|-----------------|-------------------------|
|        | 10, mitochondrial OS=Homo sapiens GN=NDUFA10 PE=1 SV=1                                                         | 4226            | 1221                    |
|        | - [NDUAA_HUMAN]                                                                                                |                 |                         |
| Q13423 | NAD(P) transhydrogenase, mitochondrial OS=Homo sapiens GN=NNT PE=1 SV=3 - [NNTM_HUMAN]                         | 1.15E-1<br>4    | 1.26347<br>9564         |
| O14745 | Na(+)/H(+) exchange regulatory cofactor NHE-RF1 OS=Homo sapiens GN=SLC9A3R1 PE=1 SV=4 - [NHRF1_HUMAN]          | 0.00000<br>0137 | 0.77789<br>062          |
| P29966 | Myristoylated alanine-rich C-kinase substrate OS=Homo sapiens GN=MARCKS PE=1 SV=4 - [MARCS_HUMAN]              | 5.71E-1<br>4    | 0.51006<br>6309         |
| P58546 | Myotrophin OS=Homo sapiens GN=MTPN PE=1 SV=2 - [MTPN_HUMAN]                                                    | 0.00000<br>0329 | 0.73891<br>6256         |
| P35579 | Myosin-9 OS=Homo sapiens GN=MYH9 PE=1 SV=4 - [MYH9_HUMAN]                                                      | 1.09E-8<br>1    | 0.65404<br>7502         |
| P60660 | Myosin light polypeptide 6 OS=Homo sapiens GN=MYL6 PE=1 SV=2 - [MYL6_HUMAN]                                    | 2.32E-1<br>3    | 0.77988<br>0567         |
| Q9NZM1 | Myoferlin OS=Homo sapiens GN=MYOF PE=1 SV=1 - [MYOF_HUMAN]                                                     | 2.84E-1<br>6    | 1.23177<br>5562         |
| Q969H8 | Myeloid-derived growth factor OS=Homo sapiens GN=MYDGF PE=1 SV=1 - [MYDGF_HUMAN]                               | 7.86E-1<br>7    | 0.58319<br>6647         |
| Q96S97 | Myeloid-associated differentiation marker OS=Homo sapiens GN=MYADM PE=1 SV=2 - [MYADM_HUMAN]                   | 0.01064<br>793  | 1.28438<br>4031         |
| Q6UB35 | Monofunctional C1-tetrahydrofolate synthase, mitochondrial OS=Homo sapiens GN=MTHFD1L PE=1 SV=1 - [C1TM_HUMAN] | 0.01362<br>7382 | 1.36221<br>2233         |
| P26038 | Moesin OS=Homo sapiens GN=MSN PE=1 SV=3 - [MOES_HUMAN]                                                         | 3.05E-2<br>8    | 0.73390<br>0737         |
| P27361 | Mitogen-activated protein kinase 3 OS=Homo sapiens GN=MAPK3 PE=1 SV=4 - [MK03_HUMAN]                           | 2.28E-0<br>9    | 1.29449<br>8382         |
| Q9Y3D6 | Mitochondrial fission 1 protein OS=Homo sapiens GN=FIS1 PE=1 SV=2 - [FIS1_HUMAN]                               | 0.00014<br>3431 | 0.72628<br>2342         |
| Q9Y6C9 | Mitochondrial carrier homolog 2 OS=Homo sapiens GN=MTCH2 PE=1 SV=1 - [MTCH2_HUMAN]                             | 3.31E-0<br>9    | 1.25782<br>724          |
| Q15691 | Microtubule-associated protein RP/EB family member 1 OS=Homo sapiens GN=MAPRE1 PE=1 SV=3 - [MARE1_HUMAN]       | 4.95E-1<br>4    | 0.71522<br>7644         |
| P27816 | Microtubule-associated protein 4 OS=Homo sapiens GN=MAP4 PE=1 SV=3 - [MAP4_HUMAN]                              |                 | 0.74722<br>1.7E-14 5924 |
| P10620 | Microsomal glutathione S-transferase 1 OS=Homo sapiens GN=MGST1 PE=1 SV=1 - [MGST1_HUMAN]                      | 0.00005<br>87   | 1.32880<br>5551         |
| P55001 | Microfibrillar-associated protein 2 OS=Homo sapiens GN=MFAP2 PE=2 SV=1 - [MFAP2_HUMAN]                         | 0.01603<br>3196 | 1.21106<br>1024         |
| Q16891 | MICOS complex subunit MIC60 OS=Homo sapiens GN=IMMT PE=1 SV=1 - [MIC60_HUMAN]                                  | 0.00000<br>265  | 1.21726<br>3002         |

|        |                                                                                                                                |         |         |      |      |
|--------|--------------------------------------------------------------------------------------------------------------------------------|---------|---------|------|------|
| Q02252 | Methylmalonate-semialdehyde dehydrogenase [acylating],<br>mitochondrial OS=Homo sapiens GN=ALDH6A1 PE=1 SV=2 -<br>[MMSA_HUMAN] | 0.00260 | 1.22448 | 8789 | 9795 |
| P84157 | Matrix-remodeling-associated protein 7 OS=Homo sapiens<br>GN=MXRA7 PE=1 SV=1 - [MXRA7_HUMAN]                                   | 8.47E-1 | 0.57176 | 1    | 891  |
| P40925 | Malate dehydrogenase, cytoplasmic OS=Homo sapiens<br>GN=MDH1 PE=1 SV=4 - [MDHC_HUMAN]                                          | 0.00009 | 0.67717 | 66   | 1507 |
| P14174 | Macrophage migration inhibitory factor OS=Homo sapiens<br>GN=MIF PE=1 SV=4 - [MIF_HUMAN]                                       | 0.00000 | 0.73225 | 22   | 5871 |
| P42785 | Lysosomal Pro-X carboxypeptidase OS=Homo sapiens GN=PRCP<br>PE=1 SV=1 - [PCP_HUMAN]                                            | 0.00815 | 0.68746 | 7445 | 8968 |
| P10619 | Lysosomal protective protein OS=Homo sapiens GN=CTSA PE=1<br>SV=2 - [PPGB_HUMAN]                                               | 0.00217 | 0.77265 | 2894 | 8912 |
| P36776 | Lon protease homolog, mitochondrial OS=Homo sapiens<br>GN=LONP1 PE=1 SV=2 - [LONM_HUMAN]                                       | 4.2E-09 | 1.20412 | 8441 |      |
| P07195 | L-lactate dehydrogenase B chain OS=Homo sapiens GN=LDHB<br>PE=1 SV=2 - [LDHB_HUMAN]                                            | 6.21E-2 | 0.68693 | 5    | 1135 |
| P00338 | L-lactate dehydrogenase A chain OS=Homo sapiens GN=LDHA<br>PE=1 SV=2 - [LDHA_HUMAN]                                            | 2.89E-1 | 0.63879 | 05   | 8955 |
| Q9UHB6 | LIM domain and actin-binding protein 1 OS=Homo sapiens<br>GN=LIMA1 PE=1 SV=1 - [LIMA1_HUMAN]                                   | 0.00000 | 0.74544 | 836  | 6295 |
| Q14847 | LIM and SH3 domain protein 1 OS=Homo sapiens GN=LASP1<br>PE=1 SV=2 - [LASP1_HUMAN]                                             | 0.00004 | 0.50815 | 2    | 1598 |
| Q9NZU5 | LIM and cysteine-rich domains protein 1 OS=Homo sapiens<br>GN=LMCD1 PE=1 SV=1 - [LMCD1_HUMAN]                                  | 0.00004 | 0.69552 | 43   | 0218 |
| P42704 | Leucine-rich PPR motif-containing protein, mitochondrial<br>OS=Homo sapiens GN=LRPPRC PE=1 SV=3 -<br>[LRPPRC_HUMAN]            | 4.1E-09 | 1.20192 | 3077 |      |
| Q14767 | Latent-transforming growth factor beta-binding protein 2<br>OS=Homo sapiens GN=LTBP2 PE=1 SV=3 - [LTBP2_HUMAN]                 | 8.17E-2 | 0.68401 | 1    | 8399 |
| P05787 | Keratin, type II cytoskeletal 8 OS=Homo sapiens GN=KRT8<br>PE=1 SV=7 - [K2C8_HUMAN]                                            | 1.92E-6 | 0.35124 | 0    | 1241 |
| P08729 | Keratin, type II cytoskeletal 7 OS=Homo sapiens GN=KRT7<br>PE=1 SV=5 - [K2C7_HUMAN]                                            | 3.02E-9 | 0.59726 | 8    | 1338 |
| P05783 | Keratin, type I cytoskeletal 18 OS=Homo sapiens GN=KRT18<br>PE=1 SV=2 - [K1C18_HUMAN]                                          | 1.69E-8 | 0.43449 | 7    | 0166 |
| P48735 | Isocitrate dehydrogenase [NADP], mitochondrial OS=Homo<br>sapiens GN=IDH2 PE=1 SV=2 - [IDHP_HUMAN]                             | 1.93E-1 | 1.25234 | 4    | 8153 |
| Q12906 | Interleukin enhancer-binding factor 3 OS=Homo sapiens<br>GN=ILF3 PE=1 SV=3 - [ILF3_HUMAN]                                      | 0.00017 | 0.78914 | 1406 | 4874 |
| Q12905 | Interleukin enhancer-binding factor 2 OS=Homo sapiens<br>GN=ILF2 PE=1 SV=2 - [ILF2_HUMAN]                                      | 0.00000 | 0.78115 | 0668 | 7131 |

|        |                                                                                                                   |         |         |      |      |
|--------|-------------------------------------------------------------------------------------------------------------------|---------|---------|------|------|
| P09914 | Interferon-induced protein with tetratricopeptide repeats 1<br>OS=Homo sapiens GN=IFIT1 PE=1 SV=2 - [IFIT1_HUMAN] | 0.00145 | 1.42566 | 3819 | 1915 |
| P20591 | Interferon-induced GTP-binding protein Mx1<br>GN=MX1 PE=1 SV=4 - [MX1_HUMAN]                                      | 3.66E-0 | 1.53087 | 9    | 2598 |
| P05362 | Intercellular adhesion molecule 1<br>OS=Homo sapiens GN=ICAM1 PE=1 SV=2 - [ICAM1_HUMAN]                           | 5.82E-1 | 1.72647 | 8    | 6753 |
| Q06033 | Inter-alpha-trypsin inhibitor heavy chain H3<br>OS=Homo sapiens GN=ITIH3 PE=1 SV=2 - [ITIH3_HUMAN]                | 0.00035 | 1.71870 | 2699 | 5243 |
| P19823 | Inter-alpha-trypsin inhibitor heavy chain H2<br>OS=Homo sapiens GN=ITIH2 PE=1 SV=2 - [ITIH2_HUMAN]                | 1.13E-2 | 1.82238 | 0    | 9354 |
| P19827 | Inter-alpha-trypsin inhibitor heavy chain H1<br>OS=Homo sapiens GN=ITIH1 PE=1 SV=3 - [ITIH1_HUMAN]                | 0.00005 | 1.47701 | 85   | 3969 |
| P08648 | Integrin alpha-5<br>OS=Homo sapiens GN=ITGA5 PE=1 SV=2 - [ITA5_HUMAN]                                             | 0.00000 | 1.23873 | 645  | 0989 |
| P17301 | Integrin alpha-2<br>OS=Homo sapiens GN=ITGA2 PE=1 SV=1 - [ITA2_HUMAN]                                             | 0.00000 | 1.44983 | 0008 | 5686 |
| Q9UKX5 | Integrin alpha-11<br>OS=Homo sapiens GN=ITGA11 PE=1 SV=2 - [ITA11_HUMAN]                                          | 0.00393 | 0.67879 | 0281 | 4461 |
| Q16270 | Insulin-like growth factor-binding protein 7<br>OS=Homo sapiens GN=IGFBP7 PE=1 SV=1 - [IBP7_HUMAN]                | 2.42E-1 | 0.50336 | 2    | 2579 |
| P01308 | Insulin<br>OS=Homo sapiens GN=INS PE=1 SV=1 - [INS_HUMAN]                                                         | 0.00014 | 2.30481 | 4055 | 1294 |
| Q13308 | Inactive tyrosine-protein kinase 7<br>OS=Homo sapiens GN=PTK7 PE=1 SV=2 - [PTK7_HUMAN]                            | 0.00001 | 0.74792 | 13   | 3178 |
| P01871 | Ig mu chain C region<br>OS=Homo sapiens GN=IGHM PE=1 SV=3 - [IGHM_HUMAN]                                          | 0.00526 | 1.36834 | 3739 | 0032 |
| P0CG05 | Ig lambda-2 chain C regions<br>OS=Homo sapiens GN=IGLC2 PE=1 SV=1 - [LAC2_HUMAN]                                  | 0.00001 | 1.37052 | 84   | 0112 |
| P01834 | Ig kappa chain C region<br>OS=Homo sapiens GN=IGKC PE=1 SV=1 - [IGKC_HUMAN]                                       | 1.13E-0 | 1.51732 | 9    | 2767 |
| P01765 | Ig heavy chain V-III region TIL<br>OS=Homo sapiens PE=1 SV=1 - [HV304_HUMAN]                                      | 0.00372 | 1.45032 | 5411 | 6323 |
| P01771 | Ig heavy chain V-III region HIL<br>OS=Homo sapiens PE=1 SV=1 - [HV310_HUMAN]                                      | 0.00639 | 2.46761 | 5187 | 2585 |
| P01781 | Ig heavy chain V-III region GAL<br>OS=Homo sapiens PE=1 SV=1 - [HV320_HUMAN]                                      | 1.81E-0 | 3.07076 | 8    | 1014 |
| P01768 | Ig heavy chain V-III region CAM<br>OS=Homo sapiens PE=1 SV=1 - [HV307_HUMAN]                                      | 0.00689 | 1.87090 | 9594 | 739  |
| P01767 | Ig heavy chain V-III region BUT<br>OS=Homo sapiens PE=1 SV=1 - [HV306_HUMAN]                                      | 0.00296 | 1.99760 | 6083 | 2877 |
| P01766 | Ig heavy chain V-III region BRO<br>OS=Homo sapiens PE=1 SV=1 - [HV305_HUMAN]                                      | 5.77E-1 | 2.16126 | 5    | 3506 |

|        |                                                                                                            |          |         |      |      |
|--------|------------------------------------------------------------------------------------------------------------|----------|---------|------|------|
| P06331 | Ig heavy chain V-II region ARH-77 OS=Homo sapiens PE=4 SV=1 - [HV209_HUMAN]                                | 2.59E-0  | 1.96290 | 8    | 1168 |
| P01743 | Ig heavy chain V-I region HG3 OS=Homo sapiens PE=3 SV=1 - [HV102_HUMAN]                                    | 7.83E-0  | 4.16513 | 8    | 5372 |
| P01742 | Ig heavy chain V-I region EU OS=Homo sapiens PE=1 SV=1 - [HV101_HUMAN]                                     | 4.26E-1  | 3.07779 | 5    | 9947 |
| P01860 | Ig gamma-3 chain C region OS=Homo sapiens GN=IGHG3 PE=1 SV=2 - [IGHG3_HUMAN]                               | 0.00308  | 1.68421 | 589  | 0526 |
| P01859 | Ig gamma-2 chain C region OS=Homo sapiens GN=IGHG2 PE=1 SV=2 - [IGHG2_HUMAN]                               | 0.00003  | 1.63979 | 6    | 2294 |
| P01857 | Ig gamma-1 chain C region OS=Homo sapiens GN=IGHG1 PE=1 SV=1 - [IGHG1_HUMAN]                               | 1.31E-1  | 1.68931 | 8    | 6013 |
| P01876 | Ig alpha-1 chain C region OS=Homo sapiens GN=IGHA1 PE=1 SV=2 - [IGHA1_HUMAN]                               | 0.00024  | 1.44014 | 0673 | 4014 |
| P35914 | Hydroxymethylglutaryl-CoA lyase, mitochondrial OS=Homo sapiens GN=HMGCL PE=1 SV=2 - [HMGCL_HUMAN]          | 0.00739  | 1.21951 | 6318 | 2195 |
| P10319 | HLA class I histocompatibility antigen, B-58 alpha chain OS=Homo sapiens GN=HLA-B PE=1 SV=1 - [1B58_HUMAN] | 0.00185  | 1.42959 | 5983 | 2566 |
| Q71DI3 | Histone H3.2 OS=Homo sapiens GN=HIST2H3A PE=1 SV=3 - [H32_HUMAN]                                           | 0.03228  | 0.74190 | 6766 | 856  |
| Q96KK5 | Histone H2A type 1-H OS=Homo sapiens GN=HIST1H2AH PE=1 SV=3 - [H2A1H_HUMAN]                                | 5.61E-1  | 0.73626 | 3    | 5402 |
| P07305 | Histone H1.0 OS=Homo sapiens GN=H1F0 PE=1 SV=3 - [H10_HUMAN]                                               | 0.01445  | 1.46092 | 3814 | 038  |
| P37235 | Hippocalcin-like protein 1 OS=Homo sapiens GN=HPCAL1 PE=1 SV=3 - [HPCL1_HUMAN]                             | 0.00001  | 0.67856 | 59   | 9914 |
| P09429 | High mobility group protein B1 OS=Homo sapiens GN=HMGB1 PE=1 SV=3 - [HMGB1_HUMAN]                          | 0.00049  | 0.78689 | 3185 | 8146 |
| P22626 | Heterogeneous nuclear ribonucleoproteins A2/B1 OS=Homo sapiens GN=HNRNPA2B1 PE=1 SV=2 - [ROA2_HUMAN]       | 2.64E-2  | 0.79399 | 1    | 3032 |
| P09651 | Heterogeneous nuclear ribonucleoprotein A1 OS=Homo sapiens GN=HNRNPA1 PE=1 SV=5 - [ROA1_HUMAN]             | 3.75E-1  | 0.71129 | 9    | 0496 |
| Q99729 | Heterogeneous nuclear ribonucleoprotein A/B OS=Homo sapiens GN=HNRNPAB PE=1 SV=2 - [ROAA_HUMAN]            | 0.00158  | 0.60964 | 1272 | 4577 |
| P68871 | Hemoglobin subunit beta OS=Homo sapiens GN=HBB PE=1 SV=2 - [HBB_HUMAN]                                     | 4.11E-1  | 1.50109 | 5    | 1703 |
| P09601 | Heme oxygenase 1 OS=Homo sapiens GN=HMOX1 PE=1 SV=1 - [HMOX1_HUMAN]                                        | -0.00237 | 1.32406 | 7607 | 4879 |
| P08238 | Heat shock protein HSP 90-beta OS=Homo sapiens GN=HSP90AB1 PE=1 SV=4 - [HS90B_HUMAN]                       | 1.24E-1  | 0.71030 | 4    | 8119 |
| P07900 | Heat shock protein HSP 90-alpha OS=Homo sapiens GN=HSP90AA1 PE=1 SV=5 - [HS90A_HUMAN]                      | 0.00000  | 0.63411 | 464  | 2267 |

|        |                                                                                                    |         |         |         |      |
|--------|----------------------------------------------------------------------------------------------------|---------|---------|---------|------|
| P04792 | Heat shock protein beta-1 OS=Homo sapiens GN=HSPB1 PE=1 SV=2 - [HSPB1_HUMAN]                       | 0.00000 | 0.50884 | 167     | 3076 |
| P11142 | Heat shock cognate 71 kDa protein OS=Homo sapiens GN=HSPA8 PE=1 SV=1 - [HSP7C_HUMAN]               | 4.35E-3 | 0.77797 | 2       | 4481 |
| Q53T59 | HCLS1-binding protein 3 OS=Homo sapiens GN=HS1BP3 PE=1 SV=1 - [H1BP3_HUMAN]                        | 0.00653 | 1.20627 | 166     | 2618 |
| P32455 | Guanylate-binding protein 1 OS=Homo sapiens GN=GBP1 PE=1 SV=2 - [GBP1_HUMAN]                       | 0.00000 | 0.79470 | 546     | 6035 |
| Q92963 | GTP-binding protein Rit1 OS=Homo sapiens GN=RIT1 PE=1 SV=1 - [RIT1_HUMAN]                          | 0.00438 | 1.41043 | 4689    | 7236 |
| Q99988 | Growth/differentiation factor 15 OS=Homo sapiens GN=GDF15 PE=2 SV=3 - [GDF15_HUMAN]                | 0.00024 | 1.79051 | 1258    | 0295 |
| P28799 | Granulins OS=Homo sapiens GN=GRN PE=1 SV=2 - [GRN_HUMAN]                                           | 0.00000 | 0.72064 | 0189    | 2813 |
| Q9Y625 | Glypican-6 OS=Homo sapiens GN=GPC6 PE=1 SV=1 - [GPC6_HUMAN]                                        | 0.02752 | 0.78492 | 1936    | 9356 |
| P30419 | Glycylpeptide N-tetradecanoyltransferase 1 OS=Homo sapiens GN=NMT1 PE=1 SV=2 - [NMT1_HUMAN]        | 0.02279 | 0.78659 | 2422    | 6397 |
| P13807 | Glycogen [starch] synthase, muscle OS=Homo sapiens GN=GYS1 PE=1 SV=2 - [GYS1_HUMAN]                | 0.00000 | 1.27918 | 733     | 1324 |
| P43304 | Glycerol-3-phosphate dehydrogenase, mitochondrial OS=Homo sapiens GN=GPD2 PE=1 SV=3 - [GPDM_HUMAN] | 0.00176 | 1.61290 | 0959    | 3226 |
| P04406 | Glyceraldehyde-3-phosphate dehydrogenase OS=Homo sapiens GN=GAPDH PE=1 SV=3 - [G3P_HUMAN]          | 8.39E-1 | 0.73832 | 98      | 5076 |
| P09211 | Glutathione S-transferase P OS=Homo sapiens GN=GSTP1 PE=1 SV=2 - [GSTP1_HUMAN]                     | 7.77E-4 | 0.69535 | 8       | 3179 |
| P22352 | Glutathione peroxidase 3 OS=Homo sapiens GN=GPX3 PE=1 SV=2 - [GPX3_HUMAN]                          | 0.00000 | 1.32146 | 0772    | 605  |
| Q86SX6 | Glutaredoxin-related protein 5, mitochondrial OS=Homo sapiens GN=GLRX5 PE=1 SV=2 - [GLRX5_HUMAN]   | 0.00118 | 1.35135 | 7385    | 1351 |
| P00367 | Glutamate dehydrogenase 1, mitochondrial OS=Homo sapiens GN=GLUD1 PE=1 SV=2 - [DHE3_HUMAN]         | 0.00014 | 1.26262 | 9528    | 6263 |
| P14314 | Glucosidase 2 subunit beta OS=Homo sapiens GN=PRKCSH PE=1 SV=2 - [GLU2B_HUMAN]                     | 1.49E-1 | 0.77878 | 7       | 5873 |
| P06744 | Glucose-6-phosphate isomerase OS=Homo sapiens GN=GPI PE=1 SV=4 - [G6PI_HUMAN]                      | 1.93E-0 | 0.56453 | 9       | 271  |
| P07093 | Glia-derived nexin OS=Homo sapiens GN=SERPINE2 PE=1 SV=1 - [GDN_HUMAN]                             |         | 1.25024 | 3.8E-12 | 4188 |
| Q92820 | Gamma-glutamyl hydrolase OS=Homo sapiens GN=GGH PE=1 SV=2 - [GGH_HUMAN]                            | 0.00001 | 0.71612 | 34      | 7184 |
| P09382 | Galectin-1 OS=Homo sapiens GN=LGALS1 PE=1 SV=2 - [LEG1_HUMAN]                                      | 6.57E-3 | 0.75980 | 6       | 446  |

|        |                                                                                                            |         |         |         |      |
|--------|------------------------------------------------------------------------------------------------------------|---------|---------|---------|------|
| P09972 | Fructose-bisphosphate aldolase C OS=Homo sapiens<br>GN=ALDOC PE=1 SV=2 - [ALDOC_HUMAN]                     | 0.00000 | 0.76556 | 339     | 7145 |
| P04075 | Fructose-bisphosphate aldolase A OS=Homo sapiens<br>GN=ALDOA PE=1 SV=2 - [ALDOA_HUMAN]                     | 1.21E-2 | 0.54507 | 6       | 5965 |
| Q14192 | Four and a half LIM domains protein 2 OS=Homo sapiens<br>GN=FHL2 PE=1 SV=3 - [FHL2_HUMAN]                  | 2.17E-0 | 0.79365 | 9       | 0794 |
| Q12841 | Follistatin-related protein 1 OS=Homo sapiens GN=FSTL1 PE=1<br>SV=1 - [FSTL1_HUMAN]                        | 0.00737 | 0.48943 | 6994    | 6332 |
| Q14315 | Filamin-C OS=Homo sapiens GN=FLNC PE=1 SV=3 -<br>[FLNC_HUMAN]                                              | 7.56E-3 | 0.75129 | 5       | 4896 |
| O75369 | Filamin-B OS=Homo sapiens GN=FLNB PE=1 SV=2 -<br>[FLNB_HUMAN]                                              | 1.44E-1 | 0.73681 | 06      | 7973 |
| P21333 | Filamin-A OS=Homo sapiens GN=FLNA PE=1 SV=4 -<br>[FLNA_HUMAN]                                              |         | 0.54232 | 0       | 6377 |
| P98095 | Fibulin-2 OS=Homo sapiens GN=FBLN2 PE=1 SV=2 -<br>[FBLN2_HUMAN]                                            | 0.04989 | 1.44805 | 0515    | 1165 |
| P23142 | Fibulin-1 OS=Homo sapiens GN=FBLN1 PE=1 SV=4 -<br>[FBLN1_HUMAN]                                            | 6.09E-1 | 0.74196 | 0       | 4524 |
| P02751 | Fibronectin OS=Homo sapiens GN=FN1 PE=1 SV=4 -<br>[FINC_HUMAN]                                             | 0.00000 | 0.69214 | 0355    | 1886 |
| P02679 | Fibrinogen gamma chain OS=Homo sapiens GN=FGG PE=1<br>SV=3 - [FIBG_HUMAN]                                  | 2.99E-0 | 1.76124 | 9       | 5553 |
| P02675 | Fibrinogen beta chain OS=Homo sapiens GN=FGB PE=1 SV=2 -<br>[FIBB_HUMAN]                                   | 1.34E-1 | 1.62384 | 0       | 9773 |
| P02671 | Fibrinogen alpha chain OS=Homo sapiens GN=FGA PE=1 SV=2<br>- [FIBA_HUMAN]                                  | 1.56E-1 | 1.65590 | 1       | 0581 |
| P35556 | Fibrillin-2 OS=Homo sapiens GN=FBN2 PE=1 SV=3 -<br>[FBN2_HUMAN]                                            |         | 1.36418 | 4.7E-54 | 4899 |
| P35555 | Fibrillin-1 OS=Homo sapiens GN=FBN1 PE=1 SV=3 -<br>[FBN1_HUMAN]                                            | 2.34E-5 | 1.23282 | 6       | 6873 |
| P02794 | Ferritin heavy chain OS=Homo sapiens GN=FTH1 PE=1 SV=2 -<br>[FRIH_HUMAN]                                   | 0.00079 | 1.20529 | 7876    | 1228 |
| Q5SYB0 | FERM and PDZ domain-containing protein 1 OS=Homo sapiens<br>GN=FRMPD1 PE=1 SV=1 - [FRPD1_HUMAN]            | 0.00000 | 0.61808 | 843     | 5172 |
| Q01469 | Fatty acid-binding protein, epidermal OS=Homo sapiens<br>GN=FABP5 PE=1 SV=3 - [FABP5_HUMAN]                | 0.00628 | 0.77041 | 5083    | 6025 |
| P15311 | Ezrin OS=Homo sapiens GN=EZR PE=1 SV=4 -<br>[EZRI_HUMAN]                                                   | 1.36E-2 | 0.50882 | 0       | 6297 |
| Q14152 | Eukaryotic translation initiation factor 3 subunit A OS=Homo<br>sapiens GN=EIF3A PE=1 SV=1 - [EIF3A_HUMAN] | 0.00017 | 0.76804 | 8797    | 9155 |
| Q9BY44 | Eukaryotic translation initiation factor 2A OS=Homo sapiens<br>GN=EIF2A PE=1 SV=3 - [EIF2A_HUMAN]          | 0.01149 | 0.76437 | 5148    | 9897 |

|        |                                                                                                                                                                   |         |         |      |      |
|--------|-------------------------------------------------------------------------------------------------------------------------------------------------------------------|---------|---------|------|------|
| Q14240 | Eukaryotic initiation factor 4A-II OS=Homo sapiens GN=EIF4A2 PE=1 SV=2 - [IF4A2_HUMAN]                                                                            | 0.00002 | 0.78397 | 28   | 2125 |
| Q8N766 | ER membrane protein complex subunit 1 OS=Homo sapiens GN=EMC1 PE=1 SV=1 - [EMC1_HUMAN]                                                                            | 0.00004 | 1.30480 | 44   | 167  |
| P61916 | Epididymal secretory protein E1 OS=Homo sapiens GN=NPC2 PE=1 SV=1 - [NPC2_HUMAN]                                                                                  | 0.00076 | 0.73746 | 6874 | 3127 |
| P17813 | Endoglin OS=Homo sapiens GN=ENG PE=1 SV=2 - [EGLN_HUMAN]                                                                                                          | 0.03693 | 1.57604 | 2727 | 4129 |
| Q9Y6C2 | EMILIN-1 OS=Homo sapiens GN=EMILIN1 PE=1 SV=2 - [EMIL1_HUMAN]                                                                                                     | 0.00309 | 1.39165 | 5527 | 0099 |
| P26641 | Elongation factor 1-gamma OS=Homo sapiens GN=EEF1G PE=1 SV=3 - [EF1G_HUMAN]                                                                                       | 1.59E-2 | 0.76474 | 1    | 7602 |
| P29692 | Elongation factor 1-delta OS=Homo sapiens GN=EEF1D PE=1 SV=5 - [EF1D_HUMAN]                                                                                       | 3.98E-0 | 0.66981 | 9    | 2757 |
| P24534 | Elongation factor 1-beta OS=Homo sapiens GN=EEF1B2 PE=1 SV=3 - [EF1B_HUMAN]                                                                                       | 3.68E-1 | 0.73981 | 9    | 217  |
| Q12805 | EGF-containing fibulin-like extracellular matrix protein 1 OS=Homo sapiens GN=EFEMP1 PE=1 SV=2 - [FBLN3_HUMAN]                                                    | 0.00889 | 0.68682 | 6915 | 9642 |
| Q13561 | Dynactin subunit 2 OS=Homo sapiens GN=DCTN2 PE=1 SV=4 - [DCTN2_HUMAN]                                                                                             | 0.00000 | 0.75234 | 0114 | 638  |
| Q16643 | Drebrin OS=Homo sapiens GN=DBN1 PE=1 SV=4 - [DREB_HUMAN]                                                                                                          | 5.91E-0 | 0.74560 | 8    | 6964 |
| Q9Y673 | Dolichyl-phosphate beta-glucosyltransferase OS=Homo sapiens GN=ALG5 PE=1 SV=1 - [ALG5_HUMAN]                                                                      | 0.00200 | 1.31578 | 351  | 9474 |
| Q8TCJ2 | Dolichyl-diphosphooligosaccharide--protein glycosyltransferase subunit STT3B OS=Homo sapiens GN=STT3B PE=1 SV=1 - [STT3B_HUMAN]                                   | 0.00278 | 1.21053 | 1709 | 1626 |
| Q16531 | DNA damage-binding protein 1 OS=Homo sapiens GN=DDB1 PE=1 SV=1 - [DDB1_HUMAN]                                                                                     | 0.00536 | 0.78232 | 0782 | 7631 |
| Q12959 | Disks large homolog 1 OS=Homo sapiens GN=DLG1 PE=1 SV=2 - [DLG1_HUMAN]                                                                                            | 0.00241 | 0.75030 | 9435 | 8162 |
| Q9UHL4 | Dipeptidyl peptidase 2 OS=Homo sapiens GN=DPP7 PE=1 SV=3 - [DPP2_HUMAN]                                                                                           | 0.00015 | 0.52298 | 5641 | 406  |
| O14531 | Dihydropyrimidinase-related protein 4 OS=Homo sapiens GN=DPYSL4 PE=1 SV=2 - [DPYL4_HUMAN]                                                                         | 0.04709 | 1.30229 | 8592 | 5295 |
| P36957 | Dihydrolipoyllysine-residue succinyltransferase component of 2-oxoglutarate dehydrogenase complex, mitochondrial OS=Homo sapiens GN=DLST PE=1 SV=4 - [ODO2_HUMAN] | 0.00135 | 1.40039 | 9075 | 678  |
| P54886 | Delta-1-pyrroline-5-carboxylate synthase OS=Homo sapiens GN=ALDH18A1 PE=1 SV=2 - [P5CS_HUMAN]                                                                     | 0.00000 | 1.20631 | 109  | 0911 |
| O43175 | D-3-phosphoglycerate dehydrogenase OS=Homo sapiens                                                                                                                | 0.00000 | 1.40944 |      |      |



|        |                                                                                                                |         |         |
|--------|----------------------------------------------------------------------------------------------------------------|---------|---------|
|        | GN=PHGDH PE=1 SV=4 - [SERA_HUMAN]                                                                              | 11      | 327     |
| P15954 | Cytochrome c oxidase subunit 7C, mitochondrial OS=Homo sapiens GN=COX7C PE=1 SV=1 - [COX7C_HUMAN]              | 0.00044 | 1.57697 |
| P14406 | Cytochrome c oxidase subunit 7A2, mitochondrial OS=Homo sapiens GN=COX7A2 PE=1 SV=1 - [CX7A2_HUMAN]            | 6121    | 6148    |
| P09669 | Cytochrome c oxidase subunit 6C OS=Homo sapiens GN=COX6C PE=1 SV=2 - [COX6C_HUMAN]                             | 0.00654 | 1.26923 |
| P10606 | Cytochrome c oxidase subunit 5B, mitochondrial OS=Homo sapiens GN=COX5B PE=1 SV=2 - [COX5B_HUMAN]              | 1051    | 6871    |
| P20674 | Cytochrome c oxidase subunit 5A, mitochondrial OS=Homo sapiens GN=COX5A PE=1 SV=2 - [COX5A_HUMAN]              | 0.00388 | 1.41183 |
| P13073 | Cytochrome c oxidase subunit 4 isoform 1, mitochondrial OS=Homo sapiens GN=COX4I1 PE=1 SV=1 - [COX4I_HUMAN]    | 9319    | 1145    |
| P00403 | Cytochrome c oxidase subunit 2 OS=Homo sapiens GN=MT-CO2 PE=1 SV=1 - [COX2_HUMAN]                              | 0.04749 | 1.20419 |
| Q9Y2R0 | Cytochrome c oxidase assembly factor 3 homolog, mitochondrial OS=Homo sapiens GN=COA3 PE=1 SV=1 - [COA3_HUMAN] | 392     | 7489    |
| P99999 | Cytochrome c OS=Homo sapiens GN=CYCS PE=1 SV=2 - [CYC_HUMAN]                                                   | 4.34E-0 | 1.52322 |
| P47985 | Cytochrome b-c1 complex subunit Rieske, mitochondrial OS=Homo sapiens GN=UQCRFS1 PE=1 SV=2 - [UCRI_HUMAN]      | 8       | 9246    |
| P22695 | Cytochrome b-c1 complex subunit 2, mitochondrial OS=Homo sapiens GN=UQCRC2 PE=1 SV=3 - [QCR2_HUMAN]            | 0.00000 | 1.22966 |
| P31930 | Cytochrome b-c1 complex subunit 1, mitochondrial OS=Homo sapiens GN=UQCRC1 PE=1 SV=3 - [QCR1_HUMAN]            | 0326    | 8548    |
| P52943 | Cysteine-rich protein 2 OS=Homo sapiens GN=CRIP2 PE=1 SV=1 - [CRIP2_HUMAN]                                     | 1.56E-1 | 1.36588 |
| Q16527 | Cysteine and glycine-rich protein 2 OS=Homo sapiens GN=CSRP2 PE=1 SV=3 - [CSRP2_HUMAN]                         | 4       | 6973    |
| P04080 | Cystatin-B OS=Homo sapiens GN=CSTB PE=1 SV=2 - [CYTB_HUMAN]                                                    | 0.00177 | 1.27822 |
| P42771 | Cyclin-dependent kinase inhibitor 2A OS=Homo sapiens GN=CDKN2A PE=1 SV=2 - [CDN2A_HUMAN]                       | 9469    | 7525    |
| Q9ULV4 | Coronin-1C OS=Homo sapiens GN=CORO1C PE=1 SV=1 - [COR1C_HUMAN]                                                 | 2.31E-1 | 0.52269 |
| Q9BR76 | Coronin-1B OS=Homo sapiens GN=CORO1B PE=1 SV=1 - [COR1B_HUMAN]                                                 | 7       | 7574    |
| O75131 | Copine-3 OS=Homo sapiens GN=CPNE3 PE=1 SV=1 - [CPNE3_HUMAN]                                                    | 0.00027 | 1.26887 |
| P02748 | Complement component C9 OS=Homo sapiens GN=C9 PE=1                                                             | 0.00265 | 1.24236 |

|        |                                                                                                                               |                 |                 |
|--------|-------------------------------------------------------------------------------------------------------------------------------|-----------------|-----------------|
|        | SV=2 - [CO9_HUMAN]                                                                                                            | 8               | 712             |
| P07360 | Complement component C8 gamma chain OS=Homo sapiens<br>GN=C8G PE=1 SV=3 - [CO8G_HUMAN]                                        | 1.05E-1<br>4    | 1.99945<br>4693 |
| P07358 | Complement component C8 beta chain OS=Homo sapiens<br>GN=C8B PE=1 SV=3 - [CO8B_HUMAN]                                         | 2.98E-2<br>6    | 1.95588<br>395  |
| P07357 | Complement component C8 alpha chain OS=Homo sapiens<br>GN=C8A PE=1 SV=2 - [CO8A_HUMAN]                                        | 1.47E-1<br>5    | 2.00656<br>6948 |
| P10643 | Complement component C7 OS=Homo sapiens GN=C7 PE=1<br>SV=2 - [CO7_HUMAN]                                                      | 2.62E-4<br>5    | 2.05952<br>3809 |
| P13671 | Complement component C6 OS=Homo sapiens GN=C6 PE=1<br>SV=3 - [CO6_HUMAN]                                                      | 3.88E-3<br>0    | 2.18453<br>7914 |
| Q07021 | Complement component 1 Q subcomponent-binding protein,<br>mitochondrial OS=Homo sapiens GN=C1QBP PE=1 SV=1 -<br>[C1QBP_HUMAN] | 0.00008<br>11   | 1.24022<br>6476 |
| P01031 | Complement C5 OS=Homo sapiens GN=C5 PE=1 SV=4 -<br>[CO5_HUMAN]                                                                | 1.76E-6<br>6    | 2.29004<br>3662 |
| P01024 | Complement C3 OS=Homo sapiens GN=C3 PE=1 SV=2 -<br>[CO3_HUMAN]                                                                | 8.41E-5<br>5    | 1.58922<br>2988 |
| P12111 | Collagen alpha-3(VI) chain OS=Homo sapiens GN=COL6A3<br>PE=1 SV=5 - [CO6A3_HUMAN]                                             | 9.32E-2<br>4    | 1.74059<br>9483 |
| P12109 | Collagen alpha-1(VI) chain OS=Homo sapiens GN=COL6A1<br>PE=1 SV=3 - [CO6A1_HUMAN]                                             | 0.00981<br>7161 | 1.56617<br>0713 |
| P23528 | Cofilin-1 OS=Homo sapiens GN=CFL1 PE=1 SV=3 -<br>[COF1_HUMAN]                                                                 | 2.97E-4<br>3    | 0.67984<br>2665 |
| P48444 | Coatomer subunit delta OS=Homo sapiens GN=ARCN1 PE=1<br>SV=1 - [COPD_HUMAN]                                                   | 0.00034<br>7719 | 0.79928<br>679  |
| P12259 | Coagulation factor V OS=Homo sapiens GN=F5 PE=1 SV=4 -<br>[FA5_HUMAN]                                                         | 0.00000<br>0192 | 1.44906<br>5353 |
| Q14019 | Coactosin-like protein OS=Homo sapiens GN=COTL1 PE=1<br>SV=3 - [COTL1_HUMAN]                                                  |                 | 0.65631<br>1529 |
| P10909 | Clusterin OS=Homo sapiens GN=CLU PE=1 SV=1 -<br>[CLUS_HUMAN]                                                                  | 3.78E-5<br>6    | 2.14292<br>3693 |
| P09497 | Clathrin light chain B OS=Homo sapiens GN=CLTB PE=1 SV=1<br>- [CLCB_HUMAN]                                                    | 1.97E-0<br>8    | 0.73117<br>2313 |
| P09496 | Clathrin light chain A OS=Homo sapiens GN=CLTA PE=1 SV=1<br>- [CLCA_HUMAN]                                                    | 0.00002<br>22   | 0.71090<br>0474 |
| Q13185 | Chromobox protein homolog 3 OS=Homo sapiens GN=CBX3<br>PE=1 SV=4 - [CBX3_HUMAN]                                               | 0.00099<br>1485 | 0.76948<br>4445 |
| Q96NY7 | Chloride intracellular channel protein 6 OS=Homo sapiens<br>GN=CLIC6 PE=2 SV=3 - [CLIC6_HUMAN]                                | 6.92E-1<br>0    | 0.79437<br>7572 |
| Q9Y696 | Chloride intracellular channel protein 4 OS=Homo sapiens<br>GN=CLIC4 PE=1 SV=4 - [CLIC4_HUMAN]                                | 4.81E-2<br>8    | 0.74983<br>0729 |

|        |                                                                                                  |         |         |      |      |
|--------|--------------------------------------------------------------------------------------------------|---------|---------|------|------|
| P00450 | Ceruloplasmin OS=Homo sapiens GN=CP PE=1 SV=1 - [CERU_HUMAN]                                     | 0.00051 | 1.55038 | 9804 | 7597 |
| P62633 | Cellular nucleic acid-binding protein OS=Homo sapiens GN=CNBP PE=1 SV=1 - [CNBP_HUMAN]           | 0.03431 | 0.76908 | 0407 | 2869 |
| Q8NFZ8 | Cell adhesion molecule 4 OS=Homo sapiens GN=CADM4 PE=1 SV=1 - [CADM4_HUMAN]                      | 0.03502 | 0.74115 | 3488 | 2492 |
| Q9BY67 | Cell adhesion molecule 1 OS=Homo sapiens GN=CADM1 PE=1 SV=2 - [CADM1_HUMAN]                      | 0.03144 | 0.79051 | 0789 | 3834 |
| Q9NZ45 | CDGSH iron-sulfur domain-containing protein 1 OS=Homo sapiens GN=CISD1 PE=1 SV=1 - [CISD1_HUMAN] | 0.00011 | 1.32013 | 9289 | 2013 |
| P21926 | CD9 antigen OS=Homo sapiens GN=CD9 PE=1 SV=4 - [CD9_HUMAN]                                       | 0.00201 | 1.42729 | 6495 | 7056 |
| Q13740 | CD166 antigen OS=Homo sapiens GN=ALCAM PE=1 SV=2 - [CD166_HUMAN]                                 | 1.43E-0 | 0.76150 | 9    | 3565 |
| P07339 | Cathepsin D OS=Homo sapiens GN=CTSD PE=1 SV=1 - [CATD_HUMAN]                                     | 2.33E-4 | 0.39720 | 1    | 4951 |
| P07858 | Cathepsin B OS=Homo sapiens GN=CTSB PE=1 SV=3 - [CATB_HUMAN]                                     | 2.99E-1 | 0.67129 | 5    | 3799 |
| P35222 | Catenin beta-1 OS=Homo sapiens GN=CTNNB1 PE=1 SV=1 - [CTNB1_HUMAN]                               | 0.00000 | 0.73993 | 587  | 6859 |
| P35221 | Catenin alpha-1 OS=Homo sapiens GN=CTNNA1 PE=1 SV=1 - [CTNA1_HUMAN]                              | 7.01E-1 | 0.78597 | 0    | 982  |
| O75718 | Cartilage-associated protein OS=Homo sapiens GN=CRTAP PE=1 SV=1 - [CRTAP_HUMAN]                  | 0.00000 | 0.77524 | 112  | 1875 |
| Q9UI42 | Carboxypeptidase A4 OS=Homo sapiens GN=CPA4 PE=1 SV=2 - [CBPA4_HUMAN]                            | 0.00016 | 0.69119 | 8639 | 5236 |
| O43852 | Calumenin OS=Homo sapiens GN=CALU PE=1 SV=2 - [CALU_HUMAN]                                       | 1.18E-3 | 0.71549 | 0    | 2398 |
| P27797 | Calreticulin OS=Homo sapiens GN=CALR PE=1 SV=1 - [CALR_HUMAN]                                    | 3.75E-6 | 0.71400 | 9    | 3078 |
| Q15417 | Calponin-3 OS=Homo sapiens GN=CNN3 PE=1 SV=1 - [CNN3_HUMAN]                                      | 5.74E-4 | 0.56628 | 7    | 5828 |
| Q99439 | Calponin-2 OS=Homo sapiens GN=CNN2 PE=1 SV=4 - [CNN2_HUMAN]                                      | 2.36E-1 | 0.69137 | 8    | 4042 |
| P51911 | Calponin-1 OS=Homo sapiens GN=CNN1 PE=1 SV=2 - [CNN1_HUMAN]                                      | 1.32E-2 | 0.55413 | 8    | 3443 |
| P62158 | Calmodulin OS=Homo sapiens GN=CALM1 PE=1 SV=2 - [CALM_HUMAN]                                     | 2.32E-3 | 0.66350 | 1    | 4351 |
| Q05682 | Caldesmon OS=Homo sapiens GN=CALD1 PE=1 SV=3 - [CALD1_HUMAN]                                     | 9.66E-1 | 0.45101 | 00   | 1582 |
| Q6NUK1 | Calcium-binding mitochondrial carrier protein SCaMC-1 OS=Homo sapiens GN=SLC25A24 PE=1 SV=2 -    | 0.00047 | 1.23583 | 1249 | 934  |

|        |                                                                                                                   |         |         |
|--------|-------------------------------------------------------------------------------------------------------------------|---------|---------|
|        | [SCMC1_HUMAN]                                                                                                     |         |         |
| Q9UJS0 | Calcium-binding mitochondrial carrier protein Aralar2 OS=Homo sapiens GN=SLC25A13 PE=1 SV=2 - [CMC2_HUMAN]        | 0.00000 | 1.45008 |
|        |                                                                                                                   | 024     | 3658    |
| P19022 | Cadherin-2 OS=Homo sapiens GN=CDH2 PE=1 SV=4 - [CADH2_HUMAN]                                                      | 0.01394 | 0.74472 |
|        |                                                                                                                   | 6789    | 0464    |
| P04003 | C4b-binding protein alpha chain OS=Homo sapiens GN=C4BPA PE=1 SV=2 - [C4BPA_HUMAN]                                | 0.00643 | 1.68302 |
|        |                                                                                                                   | 2456    | 9452    |
| Q9H8M2 | Bromodomain-containing protein 9 OS=Homo sapiens GN=BRD9 PE=1 SV=2 - [BRD9_HUMAN]                                 | 0.00003 | 2.21565 |
|        |                                                                                                                   | 39      | 7313    |
| P54687 | Branched-chain-amino-acid aminotransferase, cytosolic OS=Homo sapiens GN=BCAT1 PE=1 SV=3 - [BCAT1_HUMAN]          | 0.00022 | 0.71926 |
|        |                                                                                                                   | 0854    | 2756    |
| P80723 | Brain acid soluble protein 1 OS=Homo sapiens GN=BASP1 PE=1 SV=2 - [BASP1_HUMAN]                                   |         | 0.49267 |
|        |                                                                                                                   | 3.1E-11 | 6431    |
| P07738 | Bisphosphoglycerate mutase OS=Homo sapiens GN=BPGM PE=1 SV=2 - [PMGE_HUMAN]                                       | 0.00168 | 1.32494 |
|        |                                                                                                                   | 8146    | 2034    |
| P21810 | Biglycan OS=Homo sapiens GN=BGN PE=1 SV=2 - [PGS1_HUMAN]                                                          | 0.01873 | 1.32987 |
|        |                                                                                                                   | 3958    | 5657    |
| O95340 | Bifunctional 3'-phosphoadenosine 5'-phosphosulfate synthase 2 OS=Homo sapiens GN=PAPSS2 PE=1 SV=2 - [PAPS2_HUMAN] | 2.24E-0 | 1.21914 |
|        |                                                                                                                   | 8       | 0506    |
| P07686 | Beta-hexosaminidase subunit beta OS=Homo sapiens GN=HEXB PE=1 SV=3 - [HEXB_HUMAN]                                 | 0.00000 | 0.78589 |
|        |                                                                                                                   | 0068    | 6726    |
| P06865 | Beta-hexosaminidase subunit alpha OS=Homo sapiens GN=HEXA PE=1 SV=2 - [HEXA_HUMAN]                                | 0.00005 | 0.67347 |
|        |                                                                                                                   | 16      | 626     |
| P16278 | Beta-galactosidase OS=Homo sapiens GN=GLB1 PE=1 SV=2 - [BGAL_HUMAN]                                               | 0.00011 | 0.77436 |
|        |                                                                                                                   | 0769    | 5408    |
| Q562R1 | Beta-actin-like protein 2 OS=Homo sapiens GN=ACTBL2 PE=1 SV=2 - [ACTBL_HUMAN]                                     | 0.04896 | 0.64714 |
|        |                                                                                                                   | 4546    | 4475    |
| Q96BJ3 | Axin interactor, dorsalization-associated protein OS=Homo sapiens GN=AIDA PE=1 SV=1 - [AIDA_HUMAN]                | 0.00036 | 0.74308 |
|        |                                                                                                                   | 3321    | 0067    |
| Q9UII2 | ATPase inhibitor, mitochondrial OS=Homo sapiens GN=ATPIF1 PE=1 SV=1 - [ATIF1_HUMAN]                               | 2.79E-1 | 0.56043 |
|        |                                                                                                                   | 8       | 7141    |
| Q9NVI7 | ATPase family AAA domain-containing protein 3A OS=Homo sapiens GN=ATAD3A PE=1 SV=2 - [ATD3A_HUMAN]                | 0.00000 | 1.21197 |
|        |                                                                                                                   | 612     | 4306    |
| P48047 | ATP synthase subunit O, mitochondrial OS=Homo sapiens GN=ATP5O PE=1 SV=1 - [ATPO_HUMAN]                           | 0.00009 | 1.30034 |
|        |                                                                                                                   | 55      | 0383    |
| P36542 | ATP synthase subunit gamma, mitochondrial OS=Homo sapiens GN=ATP5C1 PE=1 SV=1 - [ATPG_HUMAN]                      | 0.00276 | 1.24551 |
|        |                                                                                                                   | 4607    | 2492    |
| O75964 | ATP synthase subunit g, mitochondrial OS=Homo sapiens GN=ATP5L PE=1 SV=3 - [ATP5L_HUMAN]                          | 1.64E-1 | 1.46747 |
|        |                                                                                                                   | 3       | 1059    |
| P56134 | ATP synthase subunit f, mitochondrial OS=Homo sapiens                                                             | 0.00000 | 1.33856 |

|        |                                                                     |         |         |
|--------|---------------------------------------------------------------------|---------|---------|
|        | GN=ATP5J2 PE=1 SV=3 - [ATPK_HUMAN]                                  | 0041    | 0091    |
|        | ATP synthase subunit e, mitochondrial OS=Homo sapiens               | 8.74E-0 | 1.30818 |
| P56385 | GN=ATP5I PE=1 SV=2 - [ATP5I_HUMAN]                                  | 8       | 707     |
|        | ATP synthase subunit d, mitochondrial OS=Homo sapiens               | 1.74E-1 | 1.47368 |
| O75947 | GN=ATP5H PE=1 SV=3 - [ATP5H_HUMAN]                                  | 1       | 421     |
|        | ATP synthase subunit alpha, mitochondrial OS=Homo sapiens           | 4.18E-4 | 1.26795 |
| P25705 | GN=ATP5A1 PE=1 SV=1 - [ATPA_HUMAN]                                  | 0       | 8378    |
|        | ATP synthase F(0) complex subunit B1, mitochondrial OS=Homo sapiens | 0.00000 | 1.21941 |
| P24539 | GN=ATP5F1 PE=1 SV=2 - [AT5F1_HUMAN]                                 | 0446    | 3055    |
|        | Aspartyl/asparaginy beta-hydroxylase OS=Homo sapiens                | 0.00001 | 1.21332 |
| Q12797 | GN=ASPH PE=1 SV=3 - [ASPH_HUMAN]                                    | 23      | 7186    |
|        | Apolipoprotein E OS=Homo sapiens GN=APOE PE=1 SV=1 -                | 9.66E-1 | 1.82307 |
| P02649 | [APOE_HUMAN]                                                        | 6       | 8518    |
|        | Apolipoprotein B-100 OS=Homo sapiens GN=APOB PE=1 SV=2              | 0.00016 | 1.45600 |
| P04114 | - [APOB_HUMAN]                                                      | 7731    | 1456    |
|        | Apolipoprotein A-IV OS=Homo sapiens GN=APOA4 PE=1 SV=3              | 3.82E-2 | 1.87523 |
| P06727 | - [APOA4_HUMAN]                                                     | 4       | 4403    |
|        | Apolipoprotein A-I OS=Homo sapiens GN=APOA1 PE=1 SV=1 -             | 9.52E-1 | 1.86771 |
| P02647 | [APOA1_HUMAN]                                                       | 2       | 6921    |
|        | AP-1 complex subunit sigma-1A OS=Homo sapiens GN=AP1S1              | 0.04835 | 1.34740 |
| P61966 | PE=1 SV=1 - [AP1S1_HUMAN]                                           | 8688    | 6242    |
|        | Antithrombin-III OS=Homo sapiens GN=SERPINC1 PE=1 SV=1              | 4.62E-1 | 1.59645 |
| P01008 | - [ANT3_HUMAN]                                                      | 4       | 8763    |
|        | Annexin A5 OS=Homo sapiens GN=ANXA5 PE=1 SV=2 -                     | 3.13E-1 | 0.69447 |
| P08758 | [ANXA5_HUMAN]                                                       | 1       | 0002    |
|        | Annexin A2 OS=Homo sapiens GN=ANXA2 PE=1 SV=2 -                     | 3.27E-4 | 0.59317 |
| P07355 | [ANXA2_HUMAN]                                                       | 6       | 6957    |
|        | Angiopoietin-related protein 4 OS=Homo sapiens GN=ANGPTL4           | 3.22E-1 | 1.77926 |
| Q9BY76 | PE=1 SV=2 - [ANGL4_HUMAN]                                           | 1       | 6314    |
|        | Alpha-parvin OS=Homo sapiens GN=PARVA PE=1 SV=1 -                   | 0.04091 | 0.77501 |
| Q9NVD7 | [PARVA_HUMAN]                                                       | 68      | 3563    |
|        | Alpha-enolase OS=Homo sapiens GN=ENO1 PE=1 SV=2 -                   | 4.15E-1 | 0.73940 |
| P06733 | [ENOA_HUMAN]                                                        | 42      | 7026    |
|        | Alpha-actinin-4 OS=Homo sapiens GN=ACTN4 PE=1 SV=2 -                | 2.16E-7 | 0.44234 |
| O43707 | [ACTN4_HUMAN]                                                       | 6       | 5811    |
|        | Alpha-actinin-1 OS=Homo sapiens GN=ACTN1 PE=1 SV=2 -                | 6.22E-1 | 0.58106 |
| P12814 | [ACTN1_HUMAN]                                                       | 34      | 6026    |
|        | Alpha-2-macroglobulin receptor-associated protein OS=Homo sapiens   | 5.24E-0 | 0.69733 |
| P30533 | GN=LRPAP1 PE=1 SV=1 - [AMRP_HUMAN]                                  | 9       | 7273    |
|        | Aldehyde dehydrogenase, mitochondrial OS=Homo sapiens               | 0.00004 | 1.36518 |
| P05091 | GN=ALDH2 PE=1 SV=2 - [ALDH2_HUMAN]                                  | 52      | 7713    |
| O00468 | Agrin OS=Homo sapiens GN=AGRN PE=1 SV=5 -                           | 0.03625 | 0.74844 |

|        |                                                               |         |         |
|--------|---------------------------------------------------------------|---------|---------|
|        | [AGRIN_HUMAN]                                                 | 314     | 2971    |
|        | AFG3-like protein 2 OS=Homo sapiens GN=AFG3L2 PE=1 SV=2       | 0.01895 | 1.29407 |
| Q9Y4W6 | - [AFG32_HUMAN]                                               | 9304    | 9586    |
|        | ADP/ATP translocase 3 OS=Homo sapiens GN=SLC25A6 PE=1         | 4.78E-0 | 1.26156 |
| P12236 | SV=4 - [ADT3_HUMAN]                                           | 9       | 4339    |
|        | Adenylyl cyclase-associated protein 1 OS=Homo sapiens         | 3.78E-1 | 0.41087 |
| Q01518 | GN=CAP1 PE=1 SV=5 - [CAP1_HUMAN]                              | 5       | 553     |
|        | Adenylosuccinate lyase OS=Homo sapiens GN=ADSL PE=1           | 0.00006 | 0.79317 |
| P30566 | SV=2 - [PUR8_HUMAN]                                           | 96      | 8663    |
|        | Actin-related protein 2/3 complex subunit 5 OS=Homo sapiens   | 0.00092 | 0.79264 |
| O15511 | GN=ARPC5 PE=1 SV=3 - [ARPC5_HUMAN]                            | 9186    | 1643    |
|        | Actin-related protein 2/3 complex subunit 4 OS=Homo sapiens   | 0.00005 | 0.78084 |
| P59998 | GN=ARPC4 PE=1 SV=3 - [ARPC4_HUMAN]                            | 98      | 7376    |
|        | Actin-related protein 2/3 complex subunit 2 OS=Homo sapiens   | 1.99E-1 | 0.77651 |
| O15144 | GN=ARPC2 PE=1 SV=1 - [ARPC2_HUMAN]                            | 1       | 0556    |
|        | Actin, cytoplasmic 1 OS=Homo sapiens GN=ACTB PE=1 SV=1 -      | 6.58E-2 | 0.57642 |
| P60709 | [ACTB_HUMAN]                                                  | 43      | 321     |
|        | Actin, aortic smooth muscle OS=Homo sapiens GN=ACTA2          | 0.00001 | 0.69349 |
| P62736 | PE=1 SV=1 - [ACTA_HUMAN]                                      | 41      | 7307    |
|        | Acidic leucine-rich nuclear phosphoprotein 32 family member A |         |         |
|        | OS=Homo sapiens GN=ANP32A PE=1 SV=1 -                         | 0.00020 | 0.66401 |
| P39687 | [AN32A_HUMAN]                                                 | 6454    | 0624    |
|        | Acetyl-CoA acetyltransferase, cytosolic OS=Homo sapiens       | 0.00568 | 0.77002 |
| Q9BWD1 | GN=ACAT2 PE=1 SV=2 - [THIC_HUMAN]                             | 6991    | 0534    |
|        | Acetolactate synthase-like protein OS=Homo sapiens GN=ILVBL   | 0.01243 | 1.23250 |
| A1L0T0 | PE=1 SV=2 - [ILVBL_HUMAN]                                     | 0828    | 2861    |
|        | 60S ribosomal protein L4 OS=Homo sapiens GN=RPL4 PE=1         | 0.00005 | 0.79039 |
| P36578 | SV=5 - [RL4_HUMAN]                                            | 14      | 4821    |
|        | 60S ribosomal protein L38 OS=Homo sapiens GN=RPL38 PE=1       | 4.24E-0 | 1.22376 |
| P63173 | SV=2 - [RL38_HUMAN]                                           | 8       | 5527    |
|        | 60S ribosomal protein L37a OS=Homo sapiens GN=RPL37A          | 0.01389 | 0.79621 |
| P61513 | PE=1 SV=2 - [RL37A_HUMAN]                                     | 5573    | 004     |
|        | 60S ribosomal protein L36 OS=Homo sapiens GN=RPL36 PE=1       | 0.00115 | 0.74973 |
| Q9Y3U8 | SV=3 - [RL36_HUMAN]                                           | 5801    | 7592    |
|        | 60S ribosomal protein L29 OS=Homo sapiens GN=RPL29 PE=1       | 0.00385 | 0.67189 |
| P47914 | SV=2 - [RL29_HUMAN]                                           | 6154    | 2497    |
|        | 60S ribosomal protein L27 OS=Homo sapiens GN=RPL27 PE=1       | 4.43E-1 | 0.78971 |
| P61353 | SV=2 - [RL27_HUMAN]                                           | 2       | 1192    |
|        | 60S ribosomal protein L23a OS=Homo sapiens GN=RPL23A          |         | 0.71884 |
| P62750 | PE=1 SV=1 - [RL23A_HUMAN]                                     | 2.4E-11 | 058     |
|        | 60S ribosomal protein L22 OS=Homo sapiens GN=RPL22 PE=1       | 0.00000 | 0.69534 |
| P35268 | SV=2 - [RL22_HUMAN]                                           | 0358    | 4353    |

|        |                                                                                                                     |         |         |      |         |
|--------|---------------------------------------------------------------------------------------------------------------------|---------|---------|------|---------|
| P27635 | 60S ribosomal protein L10 OS=Homo sapiens GN=RPL10 PE=1 SV=4 - [RL10_HUMAN]                                         | 0.02679 | 0.77835 | 7114 | 1451    |
| P05386 | 60S acidic ribosomal protein P1 OS=Homo sapiens GN=RPLP1 PE=1 SV=1 - [RLA1_HUMAN]                                   | 0.00572 | 0.77152 | 9577 | 2256    |
| P05388 | 60S acidic ribosomal protein P0 OS=Homo sapiens GN=RPLP0 PE=1 SV=1 - [RLA0_HUMAN]                                   | 0.00000 | 0.77292 | 0427 | 9402    |
| P21589 | 5'-nucleotidase OS=Homo sapiens GN=NT5E PE=1 SV=1 - [5NTD_HUMAN]                                                    | 1.23E-1 | 1.48015 | 6    | 4248    |
| P08195 | 4F2 cell-surface antigen heavy chain OS=Homo sapiens GN=SLC3A2 PE=1 SV=3 - [4F2_HUMAN]                              | 1.6E-15 | 0.463   |      | 1.34035 |
| P62861 | 40S ribosomal protein S30 OS=Homo sapiens GN=FAU PE=1 SV=1 - [RS30_HUMAN]                                           | 0.00008 | 0.71851 | 4    | 9849    |
| P62857 | 40S ribosomal protein S28 OS=Homo sapiens GN=RPS28 PE=1 SV=1 - [RS28_HUMAN]                                         | 0.00022 | 0.38784 | 6711 | 7447    |
| P39019 | 40S ribosomal protein S19 OS=Homo sapiens GN=RPS19 PE=1 SV=2 - [RS19_HUMAN]                                         | 1.02E-2 | 0.66571 | 3    | 0774    |
| P25398 | 40S ribosomal protein S12 OS=Homo sapiens GN=RPS12 PE=1 SV=3 - [RS12_HUMAN]                                         | 4.19E-1 | 0.76426 | 2    | 6305    |
| Q02218 | 2-oxoglutarate dehydrogenase, mitochondrial OS=Homo sapiens GN=OGDH PE=1 SV=3 - [ODO1_HUMAN]                        | 0.00004 | 0.636   |      | 1.24766 |
| Q13442 | 28 kDa heat- and acid-stable phosphoprotein OS=Homo sapiens GN=PDAP1 PE=1 SV=1 - [HAP28_HUMAN]                      | 0.00037 | 0.67323 | 6469 | 8759    |
| Q16698 | 2,4-dienoyl-CoA reductase, mitochondrial OS=Homo sapiens GN=DECR1 PE=1 SV=1 - [DECR_HUMAN]                          | 0.00022 | 1.30111 | 5727 | 5241    |
| Q15147 | 1-phosphatidylinositol 4,5-bisphosphate phosphodiesterase beta-4 OS=Homo sapiens GN=PLCB4 PE=1 SV=3 - [PLCB4_HUMAN] | 0.00685 | 0.56326 | 9749 | 1283    |
| P63104 | 14-3-3 protein zeta/delta OS=Homo sapiens GN=YWHAZ PE=1 SV=1 - [1433Z_HUMAN]                                        | 9.66E-3 | 0.69678 | 6    | 0394    |
| P27348 | 14-3-3 protein theta OS=Homo sapiens GN=YWHAQ PE=1 SV=1 - [1433T_HUMAN]                                             | 2.09E-1 | 0.67224 | 0    | 38      |
| P61981 | 14-3-3 protein gamma OS=Homo sapiens GN=YWHAG PE=1 SV=2 - [1433G_HUMAN]                                             | 4.08E-1 | 0.75666 | 4    | 473     |
| P62258 | 14-3-3 protein epsilon OS=Homo sapiens GN=YWHAE PE=1 SV=1 - [1433E_HUMAN]                                           | 7.43E-2 | 0.74894 | 9    | 8663    |
| P31946 | 14-3-3 protein beta/alpha OS=Homo sapiens GN=YWHAB PE=1 SV=3 - [1433B_HUMAN]                                        | 0.00556 | 0.65955 | 0073 | 8096    |

Table S2 Differentially expressed proteins in low risk group after smoker serum stimulation (LS vs LN)(ratio<0.8 or ratio>1.2, P<0.05)

| Accession | Description                                                                                                       | p_value         | ratio           |
|-----------|-------------------------------------------------------------------------------------------------------------------|-----------------|-----------------|
|           | Armadillo repeat protein deleted in velo-cardio-facial syndrome                                                   |                 |                 |
| O00192    | OS=Homo sapiens GN=ARVCF PE=1 SV=1 -<br>[ARVC_HUMAN]                                                              | 0.00001<br>49   | 0.7597<br>34093 |
| O95857    | Tetraspanin-13 OS=Homo sapiens GN=TSPAN13 PE=2 SV=1<br>- [TSN13_HUMAN]                                            | 0.00005<br>98   | 0.6926<br>40693 |
| P01009    | Alpha-1-antitrypsin OS=Homo sapiens GN=SERPINA1 PE=1<br>SV=3 - [A1AT_HUMAN]                                       | 0.00000<br>506  | 1.2563<br>69094 |
| P01742    | Ig heavy chain V-I region EU OS=Homo sapiens PE=1 SV=1 -<br>[HV101_HUMAN]                                         | 0.00064<br>1665 | 1.4747<br>22337 |
| P01781    | Ig heavy chain V-III region GAL OS=Homo sapiens PE=1<br>SV=1 - [HV320_HUMAN]                                      | 0.00208<br>1654 | 1.2264<br>92233 |
| P02647    | Apolipoprotein A-I OS=Homo sapiens GN=APOA1 PE=1<br>SV=1 - [APOA1_HUMAN]                                          | 0.00000<br>0233 | 1.2120<br>57336 |
| P02671    | Fibrinogen alpha chain OS=Homo sapiens GN=FGA PE=1<br>SV=2 - [FIBA_HUMAN]                                         |                 | 1.3547          |
| P02675    | Fibrinogen beta chain OS=Homo sapiens GN=FGB PE=1 SV=2<br>- [FIBB_HUMAN]                                          | 0.00433<br>9253 | 1.3096<br>69728 |
| P02679    | Fibrinogen gamma chain OS=Homo sapiens GN=FGG PE=1<br>SV=3 - [FIBG_HUMAN]                                         |                 | 1.3970          |
| P02795    | Metallothionein-2 OS=Homo sapiens GN=MT2A PE=1 SV=1 -<br>[MT2_HUMAN]                                              | 0.00025<br>278  | 1.4604<br>46248 |
| P05161    | Ubiquitin-like protein ISG15 OS=Homo sapiens GN=ISG15<br>PE=1 SV=5 - [ISG15_HUMAN]                                | 0.01782<br>316  | 1.4289<br>11646 |
| P05362    | Intercellular adhesion molecule 1 OS=Homo sapiens<br>GN=ICAM1 PE=1 SV=2 - [ICAM1_HUMAN]                           | 0.00106<br>6494 | 1.2229<br>4774  |
| P07357    | Complement component C8 alpha chain OS=Homo sapiens<br>GN=C8A PE=1 SV=2 - [CO8A_HUMAN]                            | 0.00046<br>0832 | 1.2047<br>31308 |
| P09493    | Tropomyosin alpha-1 chain OS=Homo sapiens GN=TPM1<br>PE=1 SV=2 - [TPM1_HUMAN]                                     | 0.00000<br>0119 | 0.7963<br>6256  |
| P09601    | Heme oxygenase 1 OS=Homo sapiens GN=HMOX1 PE=1<br>SV=1 - [HMOX1_HUMAN]                                            | 0.01229<br>211  | 1.4199<br>50302 |
| P09914    | Interferon-induced protein with tetratricopeptide repeats 1<br>OS=Homo sapiens GN=IFIT1 PE=1 SV=2 - [IFIT1_HUMAN] | 0.01363<br>1126 | 1.8952<br>21335 |
| P10909    | Clusterin OS=Homo sapiens GN=CLU PE=1 SV=1 -<br>[CLUS_HUMAN]                                                      | 0.00000<br>43   | 1.2209<br>7106  |
| P13671    | Complement component C6 OS=Homo sapiens GN=C6 PE=1<br>SV=3 - [CO6_HUMAN]                                          | 0.00014<br>2431 | 1.2058<br>53498 |



|        |                                                                                                                  |         |        |      |       |
|--------|------------------------------------------------------------------------------------------------------------------|---------|--------|------|-------|
| P20591 | Interferon-induced GTP-binding protein Mx1 OS=Homo sapiens GN=MX1 PE=1 SV=4 - [MX1_HUMAN]                        | 0.03179 | 2.2463 | 8016 | 4968  |
| P42224 | Signal transducer and activator of transcription 1-alpha/beta OS=Homo sapiens GN=STAT1 PE=1 SV=2 - [STAT1_HUMAN] | 0.01677 | 1.2005 | 8016 | 40244 |
| P43490 | Nicotinamide phosphoribosyltransferase OS=Homo sapiens GN=NAMPT PE=1 SV=1 - [NAMPT_HUMAN]                        | 0.00001 | 1.2978 | 34   | 58533 |
| P56377 | AP-1 complex subunit sigma-2 OS=Homo sapiens GN=AP1S2 PE=1 SV=1 - [AP1S2_HUMAN]                                  | 0.01559 | 0.6500 | 6663 | 89387 |
| P62328 | Thymosin beta-4 OS=Homo sapiens GN=TMSB4X PE=1 SV=2 - [TYB4_HUMAN]                                               | 0.00000 | 1.2259 | 0232 | 91009 |
| Q16363 | Laminin subunit alpha-4 OS=Homo sapiens GN=LAMA4 PE=1 SV=4 - [LAMA4_HUMAN]                                       | 0.00082 | 0.7632 | 4632 | 61671 |
| Q6UX71 | Plexin domain-containing protein 2 OS=Homo sapiens GN=PLXDC2 PE=1 SV=1 - [PXDC2_HUMAN]                           | 0.00530 | 0.7574 | 3444 | 80116 |
| Q9BYC5 | Alpha-(1,6)-fucosyltransferase OS=Homo sapiens GN=FUT8 PE=1 SV=2 - [FUT8_HUMAN]                                  | 0.00103 | 1.2511 | 6418 | 72975 |
| Q9H3P7 | Golgi resident protein GCP60 OS=Homo sapiens GN=ACBD3 PE=1 SV=4 - [GCP60_HUMAN]                                  | 0.04075 | 0.6944 | 7832 | 44444 |
| Q9NZR1 | Tropomodulin-2 OS=Homo sapiens GN=TMOD2 PE=1 SV=1 - [TMOD2_HUMAN]                                                | 0.04012 | 0.7209 | 3839 | 80534 |
| Q9UL46 | Proteasome activator complex subunit 2 OS=Homo sapiens GN=PSME2 PE=1 SV=4 - [PSME2_HUMAN]                        | 0.00195 | 1.2204 | 3518 | 4241  |
| Q9Y4W6 | AFG3-like protein 2 OS=Homo sapiens GN=AFG3L2 PE=1 SV=2 - [AFG32_HUMAN]                                          | 0.00032 | 0.6999 | 018  | 12511 |
